# Supplementary material for: A Population-Based Genomic Study of Inherited Metabolic Diseases Detected Through Newborn Screening
Source: PubMed Central journal article supplement — Ann Lab Med. 2016 Aug 24;36(6):561–72. doi: 10.3343/alm.2016.36.6.561 (PMC5011110; doi:10.3343/alm.2016.36.6.561), 2016-08-24
Supplement: alm-36-561-s002.pdf [file alm-36-561-s002.pdf]

**Supplemental Data Table S1.** Disorders related to current newborn screening in Korea

| Disease                                                                                                                                                                   | OMIM No.       | Gene     |
|---------------------------------------------------------------------------------------------------------------------------------------------------------------------------|----------------|----------|
| <b>Amino acid disorders</b>                                                                                                                                               |                |          |
| Argininosuccinic aciduria                                                                                                                                                 | 207900         | ASL      |
| Citrullinemia type 1                                                                                                                                                      | 603470         | ASS1     |
| Citrullinemia type 2                                                                                                                                                      | 603471         | SLC25A13 |
| HHH syndrome                                                                                                                                                              | 238970         | SLC25A15 |
| Homocystinuria                                                                                                                                                            |                |          |
| Homocystinuria, B6-responsive and nonresponsive types                                                                                                                     | 236200         | CBS      |
| Homocystinuria-megaloblastic anemia, cbl E type                                                                                                                           | 236270         | MTRR     |
| Methylcobalamin deficiency, cblG type                                                                                                                                     | 250940         | MTR      |
| Homocystinuria due to methylenetetrahydrofolate reductase deficiency                                                                                                      | 236250         | MTHFR    |
| Hyperalaninemia (Pyruvate carboxylase deficiency)                                                                                                                         | 266150         | PC       |
| Hyperargininemia                                                                                                                                                          | 207800         | ARG1     |
| Hypermethioninemia                                                                                                                                                        |                |          |
| Methionine adenosyltransferase deficiency, autosomal recessive/Hypermethioninemia, persistent, autosomal dominant, due to methionine adenosyltransferase I/III deficiency | 250850         | MAT1A    |
| Hypermethioninemia with deficiency of S-adenosylhomocysteine hydrolase                                                                                                    | 613752         | AHCY     |
| Hypermethioninemia due to adenosine kinase deficiency                                                                                                                     | 614300         | ADK      |
| Hypermethioninemia with deficiency of glycine N-methyltransferase                                                                                                         | 606664         | GNMT     |
| Hyperornithinemia with gyrate atrophy                                                                                                                                     | 258870         | OAT      |
| Hyperprolinemia I                                                                                                                                                         | 239500         | PRODH    |
| Hyperprolinemia II                                                                                                                                                        | 239510         | ALDH4A1  |
| Lysinuric protein intolerance                                                                                                                                             | 222700         | SLC7A7   |
| MSUD I, II, III                                                                                                                                                           |                |          |
|                                                                                                                                                                           | 248600         | BCKDHA   |
|                                                                                                                                                                           |                | BCKDHB   |
|                                                                                                                                                                           |                | DBT      |
|                                                                                                                                                                           |                | DLD      |
| Nonketotic hyperglycinemia                                                                                                                                                | 605899         | AMT      |
|                                                                                                                                                                           |                | GLDC     |
|                                                                                                                                                                           |                | GCSH     |
| Ornithine carbamoyltransferase deficiency                                                                                                                                 | 311250         | OTC      |
| Phenylketonuria                                                                                                                                                           | 261600         | PAH      |
| Pterin disorders                                                                                                                                                          |                |          |
| GTPCH deficiency                                                                                                                                                          | 233910         | GCH1     |
| PTPS deficiency                                                                                                                                                           | 261640         | PTS      |
| DHPR deficiency                                                                                                                                                           | 261630         | QDPR     |
| PCD deficiency                                                                                                                                                            | 264070         | PCBD1    |
| Tyrosinemia                                                                                                                                                               |                |          |
| Tyrosinemia, type 1                                                                                                                                                       | 276700         | FAH      |
| Tyrosinemia, type 2                                                                                                                                                       | 276600         | TAT      |
| Tyrosinemia, type 3                                                                                                                                                       | 276710         | HPD      |
| Hyperlysinemia                                                                                                                                                            | 238700, 268700 | AASS     |
| D-glyceric aciduria                                                                                                                                                       | 220120         | GLYCTK   |

(Continued to the next page)

Supplemental Data Table S1. Continued

| Disease                                                                                                                    | OMIM No.       | Gene            |
|----------------------------------------------------------------------------------------------------------------------------|----------------|-----------------|
| Histidinemia                                                                                                               | 235800         | <i>HAL</i>      |
| Pyruvate dehydrogenase E1 alpha deficiency                                                                                 | 312170         | <i>PDHA1</i>    |
| Pyruvate dehydrogenase phosphatase deficiency                                                                              | 608782         | <i>PDP1</i>     |
| Pyruvate dehydrogenase E3 binding protein deficiency                                                                       | 245349         | <i>PDX1</i>     |
| Pyruvate dehydrogenase E2 deficiency                                                                                       | 245348         | <i>DLAT</i>     |
| Pyruvate dehydrogenase E1 beta deficiency                                                                                  | 614111         | <i>PDHB</i>     |
| Dicarboxylic aminoaciduria                                                                                                 | 222730         | <i>SLC1A1</i>   |
| <b>Organic acid disorders</b>                                                                                              |                |                 |
| 2-Methylbutyryl-coenzyme A dehydrogenase deficiency                                                                        | 610006         | <i>ACADSB</i>   |
| 3-Hydroxy-3-methylglutaryl-coenzyme A lyase deficiency                                                                     | 246450         | <i>HMGCL</i>    |
| 3-methylcrotonyl-coenzyme A carboxylase deficiency type I                                                                  | 210200         | <i>MCCC1</i>    |
| 3-methylcrotonyl-coenzyme A carboxylase deficiency type II                                                                 | 210210         | <i>MCCC2</i>    |
| 3-methylglutaconyl-coenzyme A hydratase deficiency                                                                         | 250950         | <i>AUH</i>      |
| 3-oxothiolase deficiency                                                                                                   | 203750         | <i>ACAT1</i>    |
| Biotinidase deficiency                                                                                                     | 253260         | <i>BTD</i>      |
| Glutaric acidemia type I                                                                                                   | 231670         | <i>GCDH</i>     |
| Holocarboxylase synthetase deficiency                                                                                      | 253270         | <i>HLCS</i>     |
| Isobutyryl-CoA dehydrogenase deficiency                                                                                    | 611283         | <i>ACAD8</i>    |
| Isovaleric Acidemia                                                                                                        | 243500         | <i>IVD</i>      |
| <b>Methylmalonic Acidemia</b>                                                                                              |                |                 |
| Methylmalonic aciduria, mut type                                                                                           | 251000         | <i>MUT</i>      |
| Methylmalonic aciduria and homocystinuria, cblC type                                                                       | 277400         | <i>MMACHC</i>   |
| Methylmalonic aciduria, vitamin B12-responsive                                                                             | 251100         | <i>MMAA</i>     |
| Methylmalonic aciduria, vitamin B12-responsive, due to defect in synthesis of adenosylcobalamin, cblB complementation type | 251110         | <i>MMAB</i>     |
| Methylmalonic aciduria and homocystinuria, cblD type                                                                       | 277410         | <i>MMADHC</i>   |
| Methylmalonic aciduria and homocystinuria, cblF type                                                                       | 277380         | <i>LMBRD1</i>   |
| Methylmalonyl-CoA epimerase deficiency                                                                                     | 251120         | <i>MCEE</i>     |
| <b>Propionic Acidemia</b>                                                                                                  |                |                 |
|                                                                                                                            | 606054         | <i>PCCA</i>     |
|                                                                                                                            |                | <i>PCCB</i>     |
| <b>Fatty acid oxidation/Mitochondrial disorders</b>                                                                        |                |                 |
| Carnitine deficiency, systemic primary                                                                                     | 212140         | <i>SLC22A5</i>  |
| 2,4-Dienoyl-CoA reductase deficiency                                                                                       | 222745         | <i>DECR1</i>    |
| Carnitine acylcarnitine translocase (CACT) deficiency                                                                      | 212138         | <i>SLC25A20</i> |
| Carnitine palmitoyl transferase deficiency-type I deficiency                                                               | 255120         | <i>CPT1A</i>    |
| Carnitine palmitoyl transferase deficiency-type II deficiency                                                              | 255110, 608836 | <i>CPT2</i>     |
| MCAD deficiency                                                                                                            | 201450         | <i>ACADM</i>    |
| Short-chain acyl-coenzyme A dehydrogenase deficiency (SCAD)                                                                | 201470         | <i>ACADS</i>    |
| Short-chain hydroxyacyl-coenzyme A dehydrogenase deficiency (SCHAD)                                                        | 231530         | <i>HADH</i>     |
| Trifunctional protein deficiency/LCHAD deficiency                                                                          | 609015, 609016 | <i>HADHA</i>    |
|                                                                                                                            |                | <i>HADHB</i>    |

(Continued to the next page)

Supplemental Data Table S1. Continued

| Disease                                                             | OMIM No.       | Gene                  |
|---------------------------------------------------------------------|----------------|-----------------------|
| Very long-chain acyl-coenzyme A dehydrogenase deficiency (VLCAD)    | 201475         | ACADVL                |
| Ethylmalonic encephalopathy                                         | 602473         | ETHE1                 |
| Glutaric acidemia type II                                           | 231680         | ETFDH<br>ETFA<br>ETFB |
| <b>Other disorders</b>                                              |                |                       |
| Galactosemia                                                        |                |                       |
| Galactosemia                                                        | 230400         | GALT                  |
| Galactose epimerase deficiency                                      | 230350         | GALE                  |
| Galactokinase deficiency with cataracts                             | 230200         | GALK1                 |
| CAH due to 21-hydroxylase deficiency                                | 201910         | CYP21A2               |
| Congenital hypothyroidism                                           |                |                       |
| Hypothyroidism, congenital, nongoitrous, 1                          | 275200         | TSHR                  |
| Hypothyroidism, congenital, due to thyroid dysgenesis or hypoplasia | 218700         | PAX8                  |
| Thyroid dysmorphogenesis 1                                          | 274400         | SLC5A5                |
| Thyroid dysmorphogenesis 5                                          | 274900         | DUOX2                 |
| Thyroid dysmorphogenesis 6                                          | 607200         | DUOX2                 |
| Thyroid dysmorphogenesis 2A                                         | 274500         | TPO                   |
| <b>Additional conditions</b>                                        |                |                       |
| Carbamylphosphate synthetase I deficiency                           | 237000, 265380 | CPS1                  |
| Malonic aciduria                                                    |                | MLYCD                 |
| Long-chain acyl-CoA dehydrogenase deficiency                        | 609576         | ACADL                 |
| HMG-CoA synthase deficiency                                         | 600234         | HMGCS2                |
| Creatine deficiency                                                 | 300352         | SLC6A8                |
| Cystinuria                                                          | 220100         | SLC3A1<br>SLC7A9      |
| Dicarboxylic aminoaciduria                                          | 222730         | SLC1A1                |
| ADA deficiency                                                      | 102700         | ADA                   |
| N-acetylglutamate synthase deficiency                               | 237310         | NAGS                  |
