# Supplementary material for: A Population-Based Genomic Study of Inherited Metabolic Diseases Detected Through Newborn Screening
Source: PubMed Central journal article supplement — Ann Lab Med. 2016 Aug 24;36(6):561–72. doi: 10.3343/alm.2016.36.6.561 (PMC5011110; doi:10.3343/alm.2016.36.6.561), 2016-08-24
Supplement: alm-36-561-s003.pdf [file alm-36-561-s003.pdf]

**Supplemental Data Table S2.** Variant calling criteria

| Criteria                                           | SNP  | Indel |
|----------------------------------------------------|------|-------|
| Minimum allele frequency                           | 0.15 | 0.15  |
| Minimum quality                                    | 10   | 10    |
| Minimum coverage                                   | 20   | 20    |
| Minimum coverage on either strand                  | 3    | 3     |
| Maximum strand bias                                | 0.95 | 0.85  |
| Minimum relative read quality                      | 8.5  | NA    |
| Maximum common signal shift                        | 0.25 | NA    |
| Maximum reference/variant signal shift (insertion) | NA   | 0.2   |
| Maximum reference/variant signal shift (deletion)  | NA   | 0.2   |

Abbreviation: NA, not applicable.
