# Supplementary material for: A Population-Based Genomic Study of Inherited Metabolic Diseases Detected Through Newborn Screening
Source: PubMed Central journal article supplement — Ann Lab Med. 2016 Aug 24;36(6):561–72. doi: 10.3343/alm.2016.36.6.561 (PMC5011110; doi:10.3343/alm.2016.36.6.561), 2016-08-24
Supplement: alm-36-561-s004.pdf [file alm-36-561-s004.pdf]

Supplemental Data Table S3. SNPs genotyped for haplotype analysis

| Chromosome | Position | rsID       | Distance from mutation (bp) | Ref | Alt | MAF*   |
|------------|----------|------------|-----------------------------|-----|-----|--------|
| 14         | 22111496 | rs3811189  | 240,454                     | A   | G   | 0.1944 |
| 14         | 22192440 | rs11849258 | 159,510                     | C   | G   | 0.1    |
| 14         | 22230034 | rs7140697  | 121,916                     | A   | G   | 0.3167 |
| 14         | 22271562 | rs1242745  | 80,388                      | C   | T   | 0.1    |
| 14         | 22312668 | rs1061040  | 39,282                      | C   | T   | 0.0889 |
| 14         | 22313978 | rs12436256 | 37,972                      | C   | T   | 0.4    |
| 14         | 22317527 | rs8013531  | 34,423                      | C   | T   | 0.4056 |
| 14         | 22320970 | rs17122403 | 30,980                      | G   | T   | 0.0556 |
| 14         | 22327900 | rs6572754  | 24,050                      | A   | G   | 0.1556 |
| 14         | 22329539 | rs8006372  | 22,411                      | C   | T   | 0.4056 |
| 14         | 22335648 | rs8009463  | 16,302                      | G   | T   | 0.1556 |
| 14         | 22339293 | rs3850293  | 12,657                      | C   | T   | 0.1556 |
| 14         | 22343126 | rs12146987 | 8,824                       | A   | G   | 0.1556 |
| 14         | 22347843 | rs4982676  | 4,107                       | A   | G   | 0.3889 |
| 14         | 22351950 | P.I166M†   | NA                          | A   | C   | NA     |
| 14         | 22354412 | rs2281677  | 2,462                       | A   | G   | 0.3111 |
| 14         | 22356069 | rs4982681  | 4,119                       | A   | G   | 0.4278 |
| 14         | 22396082 | rs4982697  | 44,132                      | A   | G   | 0.1389 |
| 14         | 22433377 | rs4982704  | 81,427                      | A   | C   | 0.2056 |
| 14         | 22473011 | rs11157930 | 121,061                     | G   | T   | 0.2444 |
| 14         | 22511019 | rs1923     | 159,069                     | A   | G   | 0.2389 |
| 14         | 22547433 | rs8003201  | 195,483                     | A   | G   | 0.0611 |
| 14         | 22589815 | rs3764167  | 237,865                     | C   | T   | 0.0667 |
| 15         | 42996064 | rs397358   | 200,013                     | A   | G   | 0.3944 |
| 15         | 43026616 | rs1473003  | 169,461                     | C   | T   | 0.2444 |
| 15         | 43041511 | rs12913288 | 154,566                     | C   | T   | 0.35   |
| 15         | 43087208 | rs11635836 | 108,869                     | C   | T   | 0.3389 |
| 15         | 43117488 | rs4775709  | 78,589                      | C   | G   | 0.0833 |
| 15         | 43132140 | rs2467844  | 63,937                      | C   | T   | 0.0778 |
| 15         | 43148303 | rs28662287 | 47,774                      | C   | T   | 0.2889 |
| 15         | 43172918 | rs8024922  | 23,159                      | C   | T   | 0.0556 |
| 15         | 43174842 | rs199138   | 21,235                      | A   | G   | 0.0556 |
| 15         | 43181698 | rs269866   | 14,379                      | A   | G   | 0.1    |
| 15         | 43183450 | p.R885Q†   | NA                          | C   | T   | NA     |
| 15         | 43186257 | rs269862   | 9,820                       | G   | T   | 0.0611 |
| 15         | 43192755 | rs269856   | 3,322                       | G   | T   | 0.0722 |
| 15         | 43196077 | p.Y138X†   | NA                          | -   | A   | NA     |
| 15         | 43198125 | rs16977681 | 2,048                       | A   | G   | 0.0833 |
| 15         | 43200964 | rs175088   | 4,887                       | A   | G   | 0.0778 |
| 15         | 43219098 | rs2271435  | 23,021                      | G   | T   | 0.3889 |
| 15         | 43243486 | rs1648314  | 47,409                      | A   | G   | 0.2278 |
| 15         | 43255918 | rs1648306  | 59,841                      | C   | T   | 0.3056 |

(Continued to the next page)

Supplemental Data Table S3. Continued

| Chromosome | Position  | rsID                     | Distance from mutation (bp) | Ref  | Alt | MAF*   |
|------------|-----------|--------------------------|-----------------------------|------|-----|--------|
| 15         | 43277353  | rs1648298                | 81,276                      | A    | G   | 0.2    |
| 15         | 43296616  | rs1706828                | 100,539                     | C    | T   | 0.1944 |
| 15         | 43317059  | rs12439643               | 120,982                     | C    | T   | 0.3778 |
| 15         | 43336557  | rs10519018               | 140,480                     | C    | T   | 0.0667 |
| 15         | 43356391  | rs1706767                | 160,314                     | C    | T   | 0.0667 |
| 15         | 43376050  | rs17533116               | 179,973                     | C    | T   | 0.0944 |
| 15         | 43388704  | rs11636114               | 192,627                     | C    | G   | 0.0667 |
| 3          | 137152375 | rs16843560               | 376,807                     | A    | G   | 0.25   |
| 3          | 137205821 | rs4678435                | 323,361                     | A    | G   | 0.25   |
| 3          | 137289501 | rs3772390                | 239,681                     | A    | G   | 0.1    |
| 3          | 137397166 | rs9845457                | 132,016                     | A    | G   | 0.1278 |
| 3          | 137443175 | rs561307                 | 86,007                      | C    | T   | 0.2556 |
| 3          | 137458186 | rs16843829               | 70,996                      | C    | T   | 0.1667 |
| 3          | 137463363 | rs2290131                | 65,819                      | C    | T   | 0.3944 |
| 3          | 137471982 | rs576771                 | 57,200                      | C    | T   | 0.1167 |
| 3          | 137489266 | rs1279840                | 39,916                      | C    | T   | 0.1111 |
| 3          | 137494525 | rs16843892               | 34,657                      | A    | C   | 0.1222 |
| 3          | 137510330 | rs9856769                | 18,852                      | A    | G   | 0.1056 |
| 3          | 137521958 | rs518972                 | 7,224                       | A    | C   | 0.1333 |
| 3          | 137529182 | p.Y439C <sup>†</sup>     | NA                          | A    | G   | NA     |
| 3          | 137539551 | rs696520                 | 10,369                      | C    | T   | 0.1278 |
| 3          | 137615395 | rs7620314                | 86,213                      | A    | G   | 0.1444 |
| 3          | 137701620 | rs900048                 | 172,438                     | C    | T   | 0.1056 |
| 3          | 137754936 | rs7621025                | 225,754                     | C    | T   | 0.1056 |
| 3          | 137852400 | rs4521165                | 323,218                     | C    | T   | 0.1278 |
| 3          | 137927279 | rs7616204                | 398,097                     | C    | T   | 0.1444 |
| 7          | 94768327  | rs854555                 | 888,296                     | A    | C   | 0.3833 |
| 7          | 94978512  | rs3779489                | 678,111                     | A    | T   | 0.1167 |
| 7          | 95185883  | rs10499921               | 470,740                     | C    | T   | 0.3722 |
| 7          | 95378275  | rs184381                 | 278,348                     | A    | G   | 0.3056 |
| 7          | 95578271  | rs10267710               | 78,352                      | G    | T   | 0.4333 |
| 7          | 95595831  | rs6465486                | 60,792                      | A    | G   | 0.3333 |
| 7          | 95616338  | rs3779486                | 40,285                      | C    | T   | 0.3833 |
| 7          | 95638756  | rs2301629                | 17,867                      | C    | T   | 0.3944 |
| 7          | 95656623  | p.R285Pfs*2 <sup>†</sup> | NA                          | CATA | -   | NA     |
| 7          | 95677564  | rs7807280                | 20,941                      | C    | T   | 0.3833 |
| 7          | 95697492  | rs12666465               | 40,869                      | C    | T   | 0.3833 |
| 7          | 95717042  | rs6465496                | 60,419                      | C    | T   | 0.3333 |
| 7          | 95738206  | rs35974282               | 81,583                      | C    | T   | 0.4056 |
| 7          | 95757635  | rs4729249                | 101,012                     | A    | C   | 0.25   |
| 7          | 95777521  | rs12669236               | 120,898                     | C    | T   | 0.4167 |
| 7          | 95876313  | rs17147518               | 219,690                     | A    | C   | 0.1722 |

(Continued to the next page)

Supplemental Data Table S3. Continued

| Chromosome | Position | rsID                 | Distance from mutation (bp) | Ref | Alt | MAF*   |
|------------|----------|----------------------|-----------------------------|-----|-----|--------|
| 7          | 96076707 | rs6962528            | 420,084                     | A   | G   | 0.0778 |
| 7          | 96278560 | rs9655758            | 621,937                     | A   | G   | 0.3    |
| 7          | 96477304 | rs3213654            | 820,681                     | A   | G   | 0.15   |
| 7          | 96671014 | rs6967782            | 1,014,391                   | C   | T   | 0.4833 |
| 9          | 34538009 | rs4395980            | 101,491                     | C   | T   | 0.4222 |
| 9          | 34559699 | rs1556985            | 79,801                      | C   | T   | 0.1444 |
| 9          | 34578006 | rs6476455            | 61,494                      | C   | T   | 0.4056 |
| 9          | 34590759 | rs10972162           | 48,741                      | G   | T   | 0.2111 |
| 9          | 34609621 | rs10972168           | 29,879                      | A   | G   | 0.2111 |
| 9          | 34615409 | rs10972175           | 24,091                      | A   | G   | 0.2278 |
| 9          | 34623529 | rs11791806           | 15,971                      | C   | T   | 0.3611 |
| 9          | 34627991 | rs10814130           | 11,509                      | A   | C   | 0.3722 |
| 9          | 34639500 | p.R224Q <sup>†</sup> | NA                          | G   | A   | NA     |
| 9          | 34644142 | rs3808868            | 4,642                       | G   | T   | 0.3889 |
| 9          | 34647663 | rs1104748            | 8,163                       | C   | T   | 0.2111 |
| 9          | 34653138 | rs2812365            | 13,638                      | C   | T   | 0.2556 |
| 9          | 34659171 | rs2812347            | 19,671                      | C   | T   | 0.2556 |
| 9          | 34679695 | rs2227302            | 40,195                      | A   | G   | 0.15   |
| 9          | 34700450 | rs2812377            | 60,950                      | A   | C   | 0.4389 |
| 9          | 34720015 | rs2812344            | 80,515                      | C   | T   | 0.4333 |
| 9          | 34736896 | rs2772525            | 97,396                      | A   | G   | 0.4444 |
| 1          | 23895024 | rs2280437            | 100,287                     | A   | G   | 0.4778 |
| 1          | 23916572 | rs985086             | 78,739                      | C   | T   | 0.4111 |
| 1          | 23935574 | rs10917420           | 59,737                      | C   | T   | 0.4167 |
| 1          | 23956236 | rs2076346            | 39,075                      | C   | T   | 0.4056 |
| 1          | 23974667 | rs11591202           | 20,644                      | A   | C   | 0.2833 |
| 1          | 23978120 | rs2502984            | 17,191                      | C   | T   | 0.1    |
| 1          | 23986716 | rs4237               | 8,595                       | A   | G   | 0.3833 |
| 1          | 23990422 | rs2502985            | 4,889                       | A   | G   | 0.1    |
| 1          | 23995311 | p.G302D <sup>†</sup> | NA                          | C   | T   | NA     |
| 1          | 23995573 | rs760941             | 262                         | C   | T   | 0.3889 |
| 1          | 24000451 | rs12031592           | 5,140                       | A   | C   | 0.3833 |
| 1          | 24004892 | rs2256179            | 9,581                       | A   | G   | 0.4167 |
| 1          | 24009132 | rs2473375            | 13,821                      | C   | T   | 0.4167 |
| 1          | 24020847 | rs2473377            | 25,536                      | C   | T   | 0.4167 |
| 1          | 24040606 | rs12744386           | 45,295                      | C   | T   | 0.4111 |
| 1          | 24054935 | rs11803575           | 59,624                      | A   | T   | 0.2833 |
| 1          | 24074230 | rs2501431            | 78,919                      | A   | G   | 0.4167 |
| 1          | 24094421 | rs9424398            | 99,110                      | G   | T   | 0.3278 |

\*Minor allele frequency calculated using genotype data of 90 control individuals from the Korean HapMap; <sup>†</sup>Recurrent mutations (p.I166M in *SLC7A7*, p.Y138X in *DUOX2*, p.R885Q in *DUOX2*, p.Y439C in *PCCB*, p.R285Pfs\*2 in *SLC25A13*, p.R224Q in *GALT*, p.G302D in *GALE*).

Abbreviation: NA, not applicable.
