# Supplementary material for: A Population-Based Genomic Study of Inherited Metabolic Diseases Detected Through Newborn Screening
Source: PubMed Central journal article supplement — Ann Lab Med. 2016 Aug 24;36(6):561–72. doi: 10.3343/alm.2016.36.6.561 (PMC5011110; doi:10.3343/alm.2016.36.6.561), 2016-08-24
Supplement: alm-36-561-s005.pdf [file alm-36-561-s005.pdf]

**Supplemental Data Table S4.** Sequencing quality and coverage summary of NewbornSeq

|                                  | Median     | Range                 |
|----------------------------------|------------|-----------------------|
| Number of mapped reads           | 201,670    | 144,797-368,044       |
| Percent reads on target          | 94.75%     | 88.42-95.93%          |
| Number of amplicons              | 2,054      | 2,054                 |
| Total assigned amplicon reads    | 192,114    | 134,882-350,760       |
| Percent assigned amplicon reads  | 94.75%     | 88.42-95.93%          |
| Average reads per amplicon       | 94         | 66-171                |
| Uniformity of amplicon coverage  | 92.61%     | 77.73-95.43%          |
| Amplicons with at least 1 read   | 98.93%     | 97.08-95.46%          |
| Amplicons with at least 20 reads | 93.14%     | 70.4-95.28%           |
| Total aligned base reads         | 27,527,377 | 17,715,111-50,206,887 |
| Total base reads on target       | 25,640,376 | 15,212,164-46,971,364 |
| Bases in target regions          | 289,005    | 289,005               |
| Percent base reads on target     | 93.07%     | 85.87-94.69%          |
| Average base coverage depth (X)  | 89         | 53-163                |
| Uniformity of base coverage      | 92.23%     | 74.9-95.25%           |
| Target base coverage at 1x       | 98.93%     | 96.47-99.45%          |
| Target base coverage at 20x      | 92.52%     | 62.36-95.13%          |
| Target base coverage at 100x     | 39.37%     | 14.99-70.64%          |
