# Supplementary material for: A Population-Based Genomic Study of Inherited Metabolic Diseases Detected Through Newborn Screening
Source: PubMed Central journal article supplement — Ann Lab Med. 2016 Aug 24;36(6):561–72. doi: 10.3343/alm.2016.36.6.561 (PMC5011110; doi:10.3343/alm.2016.36.6.561), 2016-08-24
Supplement: alm-36-561-s006.pdf [file alm-36-561-s006.pdf]

**Supplemental Data Table S5.** Mutation classification, diagnosis, and turnaround time in 37 control samples

| ID   | Genes           | NT alteration | AA alteration | Zygoty | NewbornSeq | Conventional classification | ACMG classification | Causality | TAT using Sanger sequencing (days) | Diagnosis        |
|------|-----------------|---------------|---------------|--------|------------|-----------------------------|---------------------|-----------|------------------------------------|------------------|
| PC1  | <i>ACADS</i>    | c.1031A>G     | p.E344G       | Hom    | Detected   | EP                          | LP                  | C         | 52                                 | SCAD deficiency  |
|      | <i>PCCA</i>     | c.1598G>T     | p.W533L       | Het    | Detected   | KP                          | LP                  | I         |                                    |                  |
|      | <i>CYP21A2</i>  | c.293-13C>G   | NA            | Het    | Detected   | KP                          | LP                  | I         |                                    |                  |
|      | <i>PDHA1</i>    | c.751A>C      | p.M251L       | Het    | Detected   | KP                          | LP                  | I         |                                    |                  |
| PC2  | <i>ASS1</i>     | c.892G>A      | p.E298K       | ComHet | Detected   | KP                          | LP                  | C         | 31                                 | CTLN1            |
|      |                 | c.689G>C      | p.G230A       |        | Detected   | KP                          | LP                  | C         |                                    |                  |
| PC3  | <i>PAH</i>      | c.442-1G>A    | NA            | Hom    | Detected   | KP                          | P                   | C         | 19                                 | PKU              |
|      | <i>PCCA</i>     | c.1598G>T     | p.W533L       | Het    | Detected   | KP                          | LP                  | I         |                                    |                  |
|      | <i>PCCB</i>     | c.1217G>T     | p.G406V       | Het    | Detected   | EP                          | VUS                 | I         |                                    |                  |
|      | <i>PDHA1</i>    | c.751A>C      | p.M251L       | Hom    | Detected   | KP                          | LP                  | I         |                                    |                  |
| PC4  | <i>PAH</i>      | c.1256A>G     | p.Q419R       | ComHet | Detected   | KP                          | LP                  | C         | 14                                 | PKU              |
|      |                 | c.1268T>C     | p.V423A       |        | Detected   | EP                          | VUS                 | C         |                                    |                  |
|      | <i>CBS</i>      | c.1552T>C     | p.Y518H       | Het    | Detected   | EP                          | VUS                 | I         |                                    |                  |
|      | <i>ASS1</i>     | c.970G>A      | p.G324S       | Het    | Detected   | KP                          | LP                  | I         |                                    |                  |
| PC5  | <i>PAH</i>      | c.833C>T      | p.T278I       | ComHet | Detected   | KP                          | LP                  | C         | 24                                 | PKU              |
|      |                 | c.491T>C      | p.I164T       |        | Detected   | KP                          | LP                  | C         |                                    |                  |
|      | <i>CPS1</i>     | c.1507G>T     | p.V503L       | Het    | Detected   | EP                          | VUS                 | I         |                                    |                  |
|      | <i>PDHA1</i>    | c.751A>C      | p.M251L       | Het    | Detected   | KP                          | LP                  | I         |                                    |                  |
| PC6  | <i>GLDC</i>     | c.2258A>C     | p.H753P       | ComHet | Detected   | KP                          | LP                  | C         | 11                                 | NKH              |
|      |                 | c.2285G>T     | p.G762V       |        | Detected   | EP                          | VUS                 | C         |                                    |                  |
| PC7  | <i>PAH</i>      | c.728G>A      | p.R243Q       | ComHet | Detected   | EP                          | VUS                 | C         | 11                                 | PKU              |
|      |                 | c.975C>G      | p.Y325*       |        | Detected   | EP                          | VUS                 | C         |                                    |                  |
|      | <i>DUOXA2</i>   | c.738C>T      | p.Y246Y       | Het    | Detected   | KP                          | LP                  | I         |                                    |                  |
| PC8  | <i>MCCC2</i>    | c.313G>C      | p.G105R       | ComHet | Detected   | EP                          | VUS                 | C         | 136                                | 3-MCC deficiency |
|      |                 | c.1252A>T     | p.I418F       |        | Detected   | EP                          | VUS                 | C         |                                    |                  |
|      | <i>SLC25A15</i> | c.292T>A      | p.L98M        | Het    | Detected   | EP                          | VUS                 | I         |                                    |                  |
|      | <i>TPO</i>      | c.1475G>A     | p.R492Q       | Het    | Detected   | KP                          | LP                  | I         |                                    |                  |
| PC9  | <i>GALE</i>     | c.207C>A      | p.D69E        | ComHet | Detected   | KP                          | LP                  | C         | 15                                 | Galactosemia     |
|      |                 | c.505C>T      | p.R169W       |        | Detected   | KP                          | LP                  | C         |                                    |                  |
|      | <i>SLC7A7</i>   | c.422A>G      | p.N141S       | Het    | Detected   | EP                          | VUS                 | I         |                                    |                  |
|      | <i>PDHA1</i>    | c.751A>C      | p.M251L       | Het    | Detected   | KP                          | LP                  | I         |                                    |                  |
| PC10 | <i>MCCC2</i>    | c.838G>T      | p.D280Y       | Hom    | Detected   | KP                          | LP                  | C         | 21                                 | 3-MCC deficiency |
|      | <i>PCCA</i>     | c.1676G>T     | p.W533L       | Het    | Detected   | KP                          | LP                  | I         |                                    |                  |
|      | <i>DUOXA2</i>   | c.738C>G      | p.Y246Y       | Het    | Detected   | KP                          | LP                  | I         |                                    |                  |
| PC11 | <i>PAH</i>      | c.728G>A      | p.R243Q       | ComHet | Detected   | EP                          | VUS                 | C         | 29                                 | PKU              |
|      |                 | c.1238G>C     | p.R413P       |        | Detected   | KP                          | LP                  | C         |                                    |                  |
|      | <i>PDHA1</i>    | c.751A>C      | p.M251L       | Het    | Detected   | KP                          | LP                  | I         |                                    |                  |

(Continued to the next page)

Supplemental Data Table S5. Continued

| ID   | Genes         | NT alteration | AA alteration | Zygoty | NewbornSeq | Conventional classification | ACMG classification | Causality | TAT using Sanger sequencing (days) | Diagnosis |
|------|---------------|---------------|---------------|--------|------------|-----------------------------|---------------------|-----------|------------------------------------|-----------|
| PC12 | <i>PAH</i>    | c.442-1G>A    | NA            | ComHet | Detected   | KP                          | P                   | C         | 19                                 | PKU       |
|      |               | c.1197A>T     | p.V399V       |        | Detected   | KP                          | LP                  | C         |                                    |           |
|      | <i>ACADM</i>  | c.697T>A      | p.X233K       | Het    | Detected   | EP                          | LP                  | I         |                                    |           |
|      | <i>DBT</i>    | c.916T>C      | p.S306P       | Het    | Detected   | EP                          | VUS                 | I         |                                    |           |
|      | <i>IVD</i>    | c.751A>C      | p.S251R       | Het    | Detected   | EP                          | VUS                 | I         |                                    |           |
| PC13 | <i>MUT</i>    | c.1481T>A     | p.L494X       | ComHet | Detected   | KP                          | P                   | C         | 6                                  | MMA       |
|      |               | c.322C>T      | p.R108C       |        | Detected   | KP                          | LP                  | C         |                                    |           |
|      | <i>IVD</i>    | c.1054T>G     | p.F352V       | Het    | Detected   | KP                          | LP                  | I         |                                    |           |
|      | <i>CPS1</i>   | c.2759G>A     | p.R920Q       | Het    | Detected   | EP                          | VUS                 | I         |                                    |           |
| PC14 | <i>PAH</i>    | c.721C>T      | p.R241C       | ComHet | Detected   | KP                          | LP                  | C         | 14                                 | PKU       |
|      |               | c.1162G>A     | p.V388M       |        | Detected   | EP                          | VUS                 | C         |                                    |           |
|      | <i>DUOXA2</i> | c.738C>G      | p.Y246Y       | Het    | Detected   | KP                          | LP                  | I         |                                    |           |
| PC15 | <i>ASS1</i>   | c.421-2A>G    | NA            | ComHet | Detected   | KP                          | P                   | C         | 16                                 | CTLN1     |
|      |               | c.970G>A      | p.G324S       |        | Detected   | KP                          | LP                  | C         |                                    |           |
| PC16 | <i>ASS1</i>   | c.421-2A>G    | NA            | Hom    | Detected   | KP                          | P                   | C         | 15                                 | CTLN1     |
|      | <i>PAH</i>    | c.158G>A      | p.R53H        | Het    | Detected   | KP                          | LP                  | I         |                                    |           |
| PC17 | <i>MUT</i>    | c.1105C>T     | p.R369C       | ComHet | Detected   | KP                          | LP                  | C         | 13                                 | MMA       |
|      |               | c.1481T>A     | p.L494X       |        | Detected   | KP                          | P                   | C         |                                    |           |
|      | <i>GALK1</i>  | c.593C>T      | p.A198V       | Het    | Detected   | KP                          | LP                  | I         |                                    |           |
| PC18 | <i>PAH</i>    | c.158G>A      | p.R53H        | ComHet | Detected   | KP                          | LP                  | C         | 3                                  | PKU       |
|      |               | c.1238G>C     | p.R413P       |        | Detected   | KP                          | LP                  | C         |                                    |           |
|      | <i>SLC7A7</i> | c.498T>G      | p.I166M       | Hom    | Detected   | EP                          | VUS                 | I         |                                    |           |
| PC19 | <i>PAH</i>    | c.611A>G      | p.Y204C       | Hom    | Detected   | KP                          | LP                  | C         | 19                                 | PKU       |
| PC20 | <i>PAH</i>    | c.721C>T      | p.R241C       | ComHet | Detected   | KP                          | LP                  | C         | 17                                 | PKU       |
|      |               | c.775G>A      | p.A259T       |        | Detected   | KP                          | LP                  | C         |                                    |           |
|      | <i>GALK1</i>  | c.593C>T      | p.A198V       | Het    | Detected   | KP                          | LP                  | I         |                                    |           |
| PC21 | <i>PAH</i>    | c.442-1G>A    | NA            | ComHet | Detected   | KP                          | P                   | C         | 27                                 | PKU       |
|      |               | c.1066-3C>T   | NA            |        | Detected   | KP                          | LP                  | C         |                                    |           |
|      | <i>DUOX2</i>  | c.1462G>A     | p.G488R       | Het    | Detected   | KP                          | P                   | I         |                                    |           |
| PC22 | <i>PAH</i>    | c.721C>T      | p.R241C       | ComHet | Detected   | KP                          | LP                  | C         | 12                                 | PKU       |
|      |               | c.728G>A      | p.R243Q       |        | Detected   | EP                          | VUS                 | C         |                                    |           |
|      | <i>PCCA</i>   | c.1598G>T     | p.W533L       | Het    | Detected   | KP                          | LP                  | I         |                                    |           |
|      | <i>PDHA1</i>  | c.751A>C      | p.M251L       | Het    | Detected   | KP                          | LP                  | I         |                                    |           |
| PC23 | <i>PAH</i>    | c.320A>G      | p.H107R       | ComHet | Detected   | KP                          | LP                  | C         | 26                                 | PKU       |
|      |               | c.1068C>A     | p.Y356*       |        | Detected   | EP                          | LP                  | C         |                                    |           |
|      | <i>GALK1</i>  | c.593C>T      | p.A198V       | Het    | Detected   | KP                          | LP                  | C         |                                    |           |
|      | <i>CPT2</i>   | c.1559C>T     | p.P520L       | Het    | Detected   | KP                          | VUS                 | I         |                                    |           |

(Continued to the next page)

Supplemental Data Table S5. Continued

| ID   | Genes   | NT alteration | AA alteration | Zygoty | NewbornSeq | Conventional classification | ACMG classification | Causality | TAT using Sanger sequencing (days) | Diagnosis |
|------|---------|---------------|---------------|--------|------------|-----------------------------|---------------------|-----------|------------------------------------|-----------|
| PC24 | PAH     | c.728G>A      | p.R243Q       | ComHet | Detected   | KP                          | VUS                 | C         | 21                                 | PKU       |
|      |         | c.1197A>T     | p.V399V       |        | Detected   | KP                          | LP                  | C         |                                    |           |
|      | PDHA1   | c.751A>C      | p.M251L       | Het    | Detected   | KP                          | LP                  | I         |                                    |           |
|      | MLYCD   | c.1247T>A     | p.L416Q       | Het    | Detected   | EP                          | VUS                 | I         |                                    |           |
| PC25 | PAH     | c.442-1G>A    | NA            | ComHet | Detected   | KP                          | P                   | C         | 22                                 | PKU       |
|      |         | c.611A>G      | p.Y204C       |        | Detected   | KP                          | LP                  | C         |                                    |           |
|      | AHCY    | c.758C>A      | p.A253D       | Het    | Detected   | EP                          | VUS                 | I         |                                    |           |
|      | HLCS    | c.710T>G      | p.L237R       | Het    | Detected   | EP                          | VUS                 | I         |                                    |           |
| PC26 | ASS1    | c.910C>T      | p.R304W       | ComHet | Detected   | KP                          | LP                  | C         | 21                                 | CTLN1     |
|      |         | c.970G>A      | p.G324S       |        | Detected   | KP                          | LP                  | C         |                                    |           |
|      | DUOX2   | c.T4541C      | p.V1514A      | Het    | Detected   | EP                          | VUS                 | I         |                                    |           |
|      | GCSH    | c.C203G       | p.T68R        | Het    | Detected   | EP                          | VUS                 | I         |                                    |           |
|      | BCKDHA  | c.C735A       | p.D245E       | Het    | Detected   | EP                          | VUS                 | I         |                                    |           |
|      | HLCS    | c.T710G       | p.L237R       | Het    | Detected   | EP                          | VUS                 | I         |                                    |           |
| PC27 | GALT    | c.286-299del  | NA            | ComHet | Detected   | EP                          | LP                  | C         | NA                                 | GAL       |
|      |         | c.378-1G>C    | NA            |        | Detected   | EP                          | LP                  | C         | NA                                 |           |
| NC1  | ACADSB  | c.848A>G      | p.Y283C       | Het    | Detected   | EP                          | LP                  | I         | NA                                 | NA        |
| NC2  | DUOXA2  | c.413dupA     | p.Y138X       | Het    | Detected   | KP                          | LP                  | I         | NA                                 | NA        |
| NC3  | GALK1   | c.593C>T      | p.A198V       | Het    | Detected   | KP                          | VUS                 | I         | NA                                 | NA        |
| NC4  | CPS1    | c.1147C>A     | p.P383T       | Het    | Detected   | EP                          | VUS                 | I         | NA                                 | NA        |
| NC5  | ETFA    | :c.478C>T     | p.R160X       | Het    | Detected   | EP                          | P                   | I         | NA                                 | NA        |
| NC6  | MTR     | c.3339delC    | p.R1113fs     | Het    | Detected   | EP                          | LP                  | I         | NA                                 | NA        |
|      | PCCA    | c.1598G>T     | p.W533L       | Het    | Detected   | EP                          | VUS                 | I         |                                    |           |
|      | PRODH   | c.998T>C      | p.L333P       | Het    | Detected   | KP                          | VUS                 | I         |                                    |           |
| NC7  | HAL     | c.203C>T      | p.P68L        | Het    | Detected   | EP                          | LP                  | I         | NA                                 | NA        |
| NC8  | ND      | ND            | ND            | ND     | ND         | ND                          | ND                  | ND        | ND                                 | ND        |
| NC9  | ALDH4A1 | c.1387dupG    | p.A463fs      | Het    | Detected   | EP                          | LP                  | I         | NA                                 | NA        |
|      | PCCB    | c.1304A>G     | p.Y435C       | Het    | Detected   | KP                          | LP                  | I         |                                    |           |
| NC10 | ND      | ND            | ND            | ND     | ND         | ND                          | ND                  | ND        | ND                                 | ND        |

Reference sequences of *ACADS*, *PCCA*, *CYP21A2*, *PDHA1*, *ASS1*, *PAH*, *PCCB*, *CBS*, *CPS1*, *GLDC*, *DUOXA2*, *MCCC2*, *SLC25A15*, *TPO*, *GALE*, *SLC7A7*, *ACADM*, *DBT*, *IVD*, *MUT*, *GALK1*, *DUOX2*, *CPT2*, *MLYCD*, *AHCY*, *HLCS*, *GCSH*, *BCKDHA*, and *GALT* were NM\_000017, NM\_001127692, NM\_000500.7, NM\_001173456, NM\_054012, NM\_000277, NM\_001127692, NM\_000071, NM\_001122634, NM\_000170, NM\_207581, NM\_022132, NM\_014252, NM\_175722, NM\_001008216, NM\_001126105, NM\_001286044, NM\_001918, NM\_001159508, NM\_000255, NM\_000154, NM\_014080, NM\_000098, NM\_012213, NM\_000687, NM\_000411, NM\_004483, NM\_000709, and NM\_000155, respectively.

Abbreviations: KP, known pathogenic based on the Human Genome Mutation Database (DM) or ClinVar (pathogenic) databases; EP, expected pathogenic; LP, likely pathogenic; VUS, variant of unknown significance; NA, not applicable; NT, nucleotide; AA, amino acid; Het, heterozygous; ComHet, compound heterozygous; Hom, homozygous; P, Pathogenic; TAT, turnaround time; ND, Not detected; I, incidental mutations; C, causal mutations.
