# Supplementary material for: A Population-Based Genomic Study of Inherited Metabolic Diseases Detected Through Newborn Screening
Source: PubMed Central journal article supplement — Ann Lab Med. 2016 Aug 24;36(6):561–72. doi: 10.3343/alm.2016.36.6.561 (PMC5011110; doi:10.3343/alm.2016.36.6.561), 2016-08-24
Supplement: alm-36-561-s007.pdf [file alm-36-561-s007.pdf]

**Supplemental Data Table S6.** Validation rate of NewbornSeq using Sanger sequencing

| Category                        | N of alleles screened<br>(N of samples) | N of alleles validated<br>(N of samples) | Validation rate |
|---------------------------------|-----------------------------------------|------------------------------------------|-----------------|
| Association positive cases      |                                         |                                          |                 |
| Heterozygote                    | 53 (50)*                                | 48 (45)                                  | 91%             |
| Compound heterozygote           | 16 (8)                                  | 16 (8)                                   | 100%            |
| Homozygote                      | 2 (1)                                   | 2 (1)                                    | 100%            |
| Sub total                       | 71 (59)                                 | 66 (54)                                  | 93%             |
| Positive cases with discrepancy |                                         |                                          |                 |
| Heterozygote                    | nt                                      | nt                                       | nt              |
| Compound heterozygote           | 12 (6)                                  | 11 (6)                                   | 92%             |
| Homozygote                      | 16 (8)                                  | 14 (7)                                   | 88%             |
| Sub total                       | 28 (14)                                 | 25 (13)                                  | 89%             |
| Total                           | 99 (73)                                 | 91 (67)                                  | 92%             |

The same mutant alleles identified in different samples were counted as different alleles. Eight mutant alleles including one case with homozygote were not validated; four alleles were not amplified via PCR and four alleles were called falsely.

\*One case (IMD\_144) with concurrent *TSHR* and *DUOX2* mutations, another case (IMD\_152) with concurrent *DUOX2* and *DUOX2A2* mutations, and the other case (IMD\_153) with concurrent *DUOX2A2* and *PAX8* mutations.

Abbreviation: nt, not tested.
