# Supplementary material for: A Population-Based Genomic Study of Inherited Metabolic Diseases Detected Through Newborn Screening
Source: PubMed Central journal article supplement — Ann Lab Med. 2016 Aug 24;36(6):561–72. doi: 10.3343/alm.2016.36.6.561 (PMC5011110; doi:10.3343/alm.2016.36.6.561), 2016-08-24
Supplement: alm-36-561-s008.pdf [file alm-36-561-s008.pdf]

**Supplemental Data Table S7.** Comparison of metabolite level among groups

| Biomarkers      | Cutoff* | APC (n=59)   |                      | PCD (n=125)  |                      | PPC (n=85)   |                      | P      |
|-----------------|---------|--------------|----------------------|--------------|----------------------|--------------|----------------------|--------|
|                 |         | N of samples | Median level (range) | N of samples | Median level (range) | N of samples | Median level (range) |        |
| TSH             | 12      | 30           | 15 (12.1-94.1)       | 57           | 16.6 (12-94.1)       | 17           | 47.5 (12.9-94.1)     | 0.0044 |
| FT4             | 0.8     | 10           | 0.35 (0.2-0.6)       | 34           | 0.5 (0.1-0.7)        | 19           | 0.5 (0.1-0.7)        | 0.0299 |
| Total galactose | 13      | 12           | 23.4 (16.5-40.4)     | 30           | 18.4 (13.5-40.4)     | 11           | 15.4 (13.1-32.2)     | 0.0810 |
| Citrulline      | 55      | 4            | 238 (129-430)        | 1            | 61.5                 | 0            | NA                   | NA     |
| Phenylalanine   | 130     | 1            | 142                  | 0            | NA                   | 2            | 3.8 (2.6-4.9)        | NA     |
| C3              | 5       | 3            | 10 (9-10)            | 3            | 10 (9-11)            | 0            | NA                   | NA     |
| C5OH            | 0.6     | 3            | 1.1 (1.1-2.6)        | 2            | 1.8 (1.1-2.6)        | 2            | 4.1 (1.1-7.3)        | NA     |

Nine samples showed multiple metabolite abnormalities. All cases were not validated using an independent Sanger sequencing. The Kruskal–Wallis test was performed to compare the metabolite levels among group with MedCalc version 11.5.1.0 (Mariakerke, Belgium). *P* values less than 0.05 were considered statistically significant.

\*The units of TSH, FT4, total galactose, citrulline, Phe, C3, and C5OH were mU/L, ng/dL, μmol/L, μmol/L, μmol/L, μmol/L, respectively.

Abbreviations: APC, Association-Positive Cases; PCD, Positive Cases with Discrepancy; PPC, Presumptive Positive Cases; NA, not applicable.
