# Supplementary material for: A Population-Based Genomic Study of Inherited Metabolic Diseases Detected Through Newborn Screening
Source: PubMed Central journal article supplement — Ann Lab Med. 2016 Aug 24;36(6):561–72. doi: 10.3343/alm.2016.36.6.561 (PMC5011110; doi:10.3343/alm.2016.36.6.561), 2016-08-24
Supplement: alm-36-561-s009.pdf [file alm-36-561-s009.pdf]

**Supplemental Data Table S8.** Detection rate of inherited metabolic diseases using the integrated screening model according to disease category

| Abnormal metabolites | Current newborn screening<br>(N of positives/No. of screened) | Genomic screening<br>(N of validated/No. of screened) | N of detected cases with the<br>integrated screening model | Detection rate |
|----------------------|---------------------------------------------------------------|-------------------------------------------------------|------------------------------------------------------------|----------------|
| Conventional markers | 231/120,700                                                   | 45/231                                                | 45                                                         | 19%            |
| Amino acids          | 13/93,165                                                     | 4/13                                                  | 4                                                          | 31%            |
| Acylcarnitines       | 25/93,165                                                     | 5/25                                                  | 5                                                          | 20%            |
| Total                | 269/93,165                                                    | 54/269                                                | 54                                                         | 20%            |

Conventional markers include 17 $\alpha$ -hydroxyprogesterone, thyroid-stimulating hormone, free thyroxine, and galactose.
