# Supplementary material for: A Population-Based Genomic Study of Inherited Metabolic Diseases Detected Through Newborn Screening
Source: PubMed Central journal article supplement — Ann Lab Med. 2016 Aug 24;36(6):561–72. doi: 10.3343/alm.2016.36.6.561 (PMC5011110; doi:10.3343/alm.2016.36.6.561), 2016-08-24
Supplement: alm-36-561-s010.pdf [file alm-36-561-s010.pdf]

**Supplemental Data Table S9.** *In silico* analyses of variants identified in ten cases with genetic alterations irrelevant to metabolite abnormalities

| Gene          | NT alteration | AA alteration | ACMG category* | 1000G | ExAC   | ESP6500 | SIFT | Polyphen2 | LRT | Mutation taster | Mutation assessor | FATHMM | GERP++ |
|---------------|---------------|---------------|----------------|-------|--------|---------|------|-----------|-----|-----------------|-------------------|--------|--------|
| <i>OTC</i>    | c.298+5G>C    | NA            | LP             | ND    | 0.0013 | ND      | NA   | NA        | NA  | NA              | NA                | NA     | NA     |
| <i>ETFB</i>   | c.155insT     | p.P52fs       | LP             | ND    | ND     | ND      | NA   | NA        | NA  | NA              | NA                | NA     | NA     |
| <i>SLC7A7</i> | c.T498G       | p.I166M       | VUS            | ND    | ND     | ND      | D    | B         | D   | P               | M                 | D      | 3.88   |
| <i>PAH</i>    | c.C721T       | p.R241C       | LP             | ND    | 0.0001 | ND      | D    | D         | D   | D               | M                 | D      | 5.92   |
| <i>PAH</i>    | c.442-1G>A    | NA            | P              | ND    | ND     | ND      | NA   | NA        | NA  | D               | NA                | NA     | 6.08   |
| <i>DUOX2</i>  | c.T3239C      | p.I1080T      | LP             | ND    | ND     | ND      | D    | P         | D   | D               | M                 | NA     | 5.6    |
| <i>DUOX2</i>  | c.A2678G      | p.N893S       | VUS            | ND    | ND     | ND      | T    | B         | D   | D               | M                 | NA     | 5.69   |
| <i>DUOX2</i>  | c.G4232A      | p.C1411Y      | VUS            | ND    | ND     | ND      | D    | D         | D   | D               | M                 | NA     | 5.8    |
| <i>PCCB</i>   | c.C1283T      | p.T428I       | LP             | ND    | ND     | ND      | D    | D         | D   | A               | H                 | T      | 5.59   |
| <i>PCCB</i>   | c.A1316G      | p.Y439C       | LP             | ND    | ND     | ND      | D    | D         | D   | D               | H                 | D      | 4.64   |

\*P, Pathogenic; LP, Likely pathogenic; VUS, variant of unknown significance.

Abbreviations: ND, not detected; NA, not applicable; D, damaging (in PolyPhen)/deleterious (in SIFT, LRT, FATHMM, and LR); P, possibly damaging (in PolyPhen); H, high (functional); M, medium (functional); N, neutral (nonfunctional); L, low (nonfunctional); T, tolerated (in SIFT); B, benign (in PolyPhen), A or D, disease-causing (in MutationTaster).
