# Supplementary material for: A Population-Based Genomic Study of Inherited Metabolic Diseases Detected Through Newborn Screening
Source: PubMed Central journal article supplement — Ann Lab Med. 2016 Aug 24;36(6):561–72. doi: 10.3343/alm.2016.36.6.561 (PMC5011110; doi:10.3343/alm.2016.36.6.561), 2016-08-24
Supplement: alm-36-561-s011.pdf [file alm-36-561-s011.pdf]

**Supplemental Data Table S10.** Cases with genetic alterations irrelevant to metabolite abnormalities

| Sample ID | Metabolite       | cut-off* | NBS tests*  | Gene            | NT alteration     | AA alteration | Conventional criteria | ACMG category | Zygosity | Disease                                | Frequency in PCD |
|-----------|------------------|----------|-------------|-----------------|-------------------|---------------|-----------------------|---------------|----------|----------------------------------------|------------------|
| IMD_002   | 17 $\alpha$ -OHP | 12       | 20.2        | <i>MTHFR</i>    | c.T193C           | p.F65L        | EP                    | VUS           | Het      | Homocystinuria                         | 1/125            |
|           |                  |          |             | <i>DUOX2</i>    | c.413dupA         | p.Y138X       | EP                    | LP            | Het      | CH                                     | 5/125            |
| IMD_004   | 17 $\alpha$ -OHP | 12       | 18.8        | <i>GALK1</i>    | c.G382A           | p.V128M       | EP                    | VUS           | Het      | Galactosemia                           | 1/125            |
|           |                  |          |             | <i>TPO</i>      | c.C2445G          | p.I815M       | EP                    | VUS           | Het      | CH                                     | 1/125            |
| IMD_005   | 17 $\alpha$ -OHP | 12       | 21.7        | <i>PC</i>       | c.G440A           | p.R147H       | EP                    | VUS           | Het      | Pyruvate carboxylase deficiency        | 2/125            |
|           |                  |          |             | <i>PCCA</i>     | c.G1598T          | p.W533L       | KP                    | LP            | Het      | Propionic Acidemia                     | 9/125            |
|           |                  |          |             | <i>SLC7A7</i>   | c.T498G           | p.I166M       | EP                    | VUS           | Het      | Lysinuric protein intolerance          | 8/125            |
| IMD_006   | 17 $\alpha$ -OHP | 12       | 12.9        | <i>SLC5A5</i>   | c.C391T           | p.L131F       | EP                    | VUS           | Het      | CH                                     | 1/125            |
| IMD_007   | 17 $\alpha$ -OHP | 12       | 32.6        | <i>MTR</i>      | c.3339delC        | p.R1113fs     | EP                    | LP            | Het      | Homocystinuria                         | 11/125           |
|           |                  |          |             | <i>PC</i>       | c.G1354A          | p.V452I       | EP                    | VUS           | Het      | Pyruvate carboxylase deficiency        | 1/125            |
|           |                  |          |             | <i>HAL</i>      | c.G394A           | p.V132M       | EP                    | VUS           | Het      | Histidinemia                           | 5/125            |
|           |                  |          |             | <i>TSHR</i>     | c.G733A           | p.G245S       | KP                    | LP            | Het      | CH                                     | 3/125            |
| IMD_008   | 17 $\alpha$ -OHP | 12       | 64.8        | <i>MTR</i>      | c.3339delC        | p.R1113fs     | EP                    | LP            | Het      | Homocystinuria                         | 11/125           |
| IMD_012   | 17 $\alpha$ -OHP | 12       | 14.8        | <i>MMAA</i>     | c.G1210A          | p.G404R       | EP                    | VUS           | Het      | MMA                                    | 1/125            |
| IMD_013   | 17 $\alpha$ -OHP | 12       | 13          | <i>HLCS</i>     | c.G1694A          | p.R565Q       | EP                    | VUS           | Het      | Holocarboxylase synthetase deficiency  | 2/125            |
| IMD_016   | 17 $\alpha$ -OHP | 12       | 24.9        | <i>BTD</i>      | c.G1625T          | p.R542M       | EP                    | VUS           | Het      | Biotinidase deficiency                 | 3/125            |
| IMD_017   | 17 $\alpha$ -OHP | 12       | 21.1        | <i>TSHR</i>     | c.G733A           | p.G245S       | KP                    | LP            | Het      | CH                                     | 3/125            |
|           |                  |          |             | <i>SLC22A5</i>  | c.C1400G          | p.S467C       | KP                    | LP            | Het      | Carnitine deficiency, systemic primary | 1/125            |
| IMD_023   | 17 $\alpha$ -OHP | 12       | 12.9        | <i>OAT</i>      | c.G47C            | p.R16P        | EP                    | VUS           | Het      | Hyperornithinemia                      | 1/125            |
| IMD_025   | 17 $\alpha$ -OHP | 12       | 13.8        | <i>ALDH4A1</i>  | c.T683A           | p.V228E       | EP                    | VUS           | Het      | Hyperprolinemia                        | 1/125            |
| IMD_033   | C0               | 7        | 3.352/4.079 | <i>SLC25A15</i> | c.T292A           | p.L98M        | EP                    | VUS           | Het      | HHH syndrome                           | 1/125            |
|           |                  |          |             | <i>PRODH</i>    | c.230_230delinsCA | .             | EP                    | LP            | Het      | Hyperprolinemia                        | 7/125            |
| IMD_035   | C0               | 7        | 4.060/4.215 | <i>DUOX2</i>    | c.G2654A          | p.R885Q       | KP                    | LP            | Het      | CH                                     | 4/125            |
|           |                  |          |             | <i>PRODH</i>    | c.230_230delinsCA | .             | EP                    | LP            | Het      | Hyperprolinemia                        | 7/125            |
|           |                  |          |             | <i>OTC</i>      | c.298+5G>C        | .             | KP                    | LP            | Hom      | OTC deficiency                         | 4/125            |
| IMD_036   | C0               | 7        | 6.599/6.623 | <i>MTR</i>      | c.3339delC        | p.R1113fs     | EP                    | LP            | Het      | Homocystinuria                         | 11/125           |
|           |                  |          |             | <i>ETFB</i>     | c.155_156insT     | p.P52fs       | EP                    | LP            | Hom      | Glutaric acidemia type II              | 1/125            |
| IMD_038   | FT4              | 0.8      | 0.7         | <i>PDX1</i>     | c.G399T           | p.Q133H       | EP                    | VUS           | Het      | Pyruvate dehydrogenase deficiency      | 2/125            |
|           |                  |          |             | <i>AHCY</i>     | c.T98C            | p.M33T        | EP                    | VUS           | Het      | Hypermethioninemia                     | 4/125            |
|           |                  |          |             | <i>BTD</i>      | c.G1625T          | p.R542M       | EP                    | VUS           | Het      | Biotinidase deficiency                 | 3/125            |
| IMD_040   | FT4              | 0.8      | 0.3         | <i>GALT</i>     | 0.0001            | .             | KP                    | LP            | Het      | Galactosemia                           | 4/125            |
|           |                  |          |             | <i>PDX1</i>     | c.G399T           | p.Q133H       | EP                    | VUS           | Het      | Pyruvate dehydrogenase deficiency      | 2/125            |
|           |                  |          |             | <i>PRODH</i>    | c.230_230delinsCA | .             | EP                    | LP            | Het      | Hyperprolinemia                        | 7/125            |
| IMD_045   | TSH              | 12       | 33.2        | <i>GCDH</i>     | c.C769T           | p.R257W       | KP                    | LP            | Het      | Glutaric acidemia type I               | 1/125            |
| IMD_055   | TSH              | 12       | 12.5        | <i>CPS1</i>     | c.1444delT        | p.L482X       | EP                    | LP            | Het      | CPS I deficiency                       | 1/125            |
|           |                  |          |             | <i>PRODH</i>    | c.230_230delinsCA | .             | EP                    | LP            | Het      | Hyperprolinemia                        | 7/125            |

(Continued to the next page)

Supplemental Data Table S10. Continued

| Sample ID | Metabolite       | cut-off* | NBS tests* | Gene            | NT alteration     | AA alteration | Conventional criteria | ACMG category | Zygosity | Disease                                | Frequency in PCD |
|-----------|------------------|----------|------------|-----------------|-------------------|---------------|-----------------------|---------------|----------|----------------------------------------|------------------|
| IMD_058   | TSH              | 12       | 29.4       | <i>PCCA</i>     | c.G1598T          | p.W533L       | KP                    | LP            | Het      | Propionic Acidemia                     | 9/125            |
| IMD_059   | TSH              | 12       | 13.1       | <i>DLAT</i>     | c.335delA         | p.E112fs      | EP                    | LP            | Het      | Pyruvate dehydrogenase deficiency      | 2/125            |
|           |                  |          |            | <i>TAT</i>      | c.C169T           | p.R57X        | KP                    | P             | Het      | Tyrosinemia                            | 1/125            |
| IMD_061   | TSH              | 12       | 15.6       | <i>MTHFR</i>    | c.C1417T          | p.R473W       | EP                    | VUS           | Het      | Homocystinuria                         | 2/125            |
| IMD_063   | TSH              | 12       | 20.7       | <i>HPD</i>      | c.G22A            | p.G8R         | EP                    | VUS           | Het      | Tyrosinemia                            | 2/125            |
|           |                  |          |            | <i>MTRR</i>     | c.30delA          | p.A10fs       | EP                    | LP            | Het      | Homocystinuria                         | 1/125            |
| IMD_064   | TSH              | 12       | 13.2       | <i>SLC7A7</i>   | c.A422G           | p.N141S       | EP                    | VUS           | Het      | Lysinuric protein intolerance          | 2/125            |
|           |                  |          |            | <i>TAT</i>      | c.C841T           | p.R281C       | EP                    | VUS           | Het      | Tyrosinemia                            | 1/125            |
| IMD_065   | TSH              | 12       | 19         | <i>DLAT</i>     | c.335delA         | p.E112fs      | EP                    | LP            | Het      | Pyruvate dehydrogenase deficiency      | 2/125            |
|           |                  |          |            | <i>SLC22A5</i>  | c.A535T           | p.M179L       | KP                    | LP            | Het      | Carnitine deficiency, systemic primary | 1/125            |
| IMD_070   | Gal              | 13       | 21.7       | <i>DUOX2</i>    | c.G4232A          | p.C1411Y      | KP                    | VUS           | Het      | CH                                     | 2/125            |
|           |                  |          |            | <i>SLC5A5</i>   | c.T1250C          | p.F417S       | EP                    | VUS           | Het      | CH                                     | 1/125            |
| IMD_071   | Gal              | 13       | 14.3       | <i>HADHA</i>    | c.C871T           | p.R291X       | KP                    | P             | Het      | Trifunctional protein deficiency       | 1/125            |
|           |                  |          |            | <i>PCCB</i>     | c.A707G           | p.N236S       | EP                    | VUS           | Het      | Propionic Acidemia                     | 1/125            |
| IMD_072   | Gal              | 13       | 13.6       | <i>MMADHC</i>   | c.T481A           | p.F161I       | EP                    | VUS           | Het      | MMA                                    | 2/125            |
| IMD_073   | Gal              | 13       | 21.6       | <i>MTR</i>      | c.3339delC        | p.R1113fs     | EP                    | LP            | Het      | Homocystinuria                         | 11/125           |
|           |                  |          |            | <i>TPO</i>      | c.C835T           | p.R279W       | EP                    | VUS           | Het      | CH                                     | 1/125            |
| IMD_075   | Gal              | 13       | 22.8       | <i>ETFA</i>     | c.G68A            | p.G23D        | EP                    | VUS           | Het      | Glutaric acidemia type II              | 1/125            |
| IMD_076   | Gal              | 13       | 17.8       | <i>HAL</i>      | c.G394A           | p.V132M       | EP                    | VUS           | ComHet   | Histidinemia                           | 5/125            |
|           |                  |          |            | <i>HAL</i>      | c.T371C           | p.I124T       | EP                    | VUS           | ComHet   | Histidinemia                           | 1/125            |
| IMD_084   | Gal              | 13       | 16.1       | <i>DBT</i>      | c.360delA         | p.K120fs      | KP                    | P             | Het      | MSUD                                   | 1/125            |
|           |                  |          |            | <i>CBS</i>      | c.444dupG         | p.N149fs      | EP                    | LP            | Het      | Homocystinuria                         | 1/125            |
| IMD_085   | Gal              | 13       | 17.1       | <i>ACADSB</i>   | c.G655A           | p.V219M       | EP                    | VUS           | Het      | 2-MBCAD deficiency                     | 2/125            |
|           |                  |          |            | <i>SLC25A20</i> | c.G773T           | p.R258L       | EP                    | VUS           | Het      | CACT deficiency                        | 1/125            |
| IMD_086   | Gal              | 13       | 15.5       | <i>OTC</i>      | c.298+5G>C        |               | KP                    | LP            | Het      | OTC deficiency                         | 4/125            |
|           |                  |          |            | <i>ACADVL</i>   | c.929dupT         | p.V310fs      | EP                    | LP            | Het      | VLCAD deficiency                       | 1/125            |
| IMD_090   | 17 $\alpha$ -OHP | 12       | 16.1       | <i>TSHR</i>     | c.1196dupC        | p.T399fs      | EP                    | LP            | Het      | CH                                     | 1/125            |
|           |                  |          |            | <i>TPO</i>      | c.C2515T          | p.P839S       | KP                    | LP            | Het      | CH                                     | 3/125            |
|           |                  |          |            | <i>MTRR</i>     | c.G319C           | p.G107R       | EP                    | VUS           | Het      | Homocystinuria                         | 1/125            |
|           |                  |          |            | <i>SLC6A8</i>   | c.1731delG        | p.M577fs      | EP                    | LP            | Het      | Creatine deficiency                    | 1/125            |
| IMD_094   | TSH              | 12       | 21.9       | <i>HAL</i>      | c.G1051C          | p.A351P       | EP                    | VUS           | ComHet   | Histidinemia                           | 3/125            |
|           |                  |          |            | <i>HAL</i>      | c.64dupC          | p.L22fs       | EP                    | LP            | ComHet   | Histidinemia                           | 1/125            |
| IMD_099   | 17 $\alpha$ -OHP | 12       | 15.6       | <i>PC</i>       | c.G2515A          | p.E839K       | EP                    | VUS           | Het      | Pyruvate carboxylase deficiency        | 1/125            |
|           |                  |          |            | <i>HAL</i>      | c.G1051C          | p.A351P       | EP                    | VUS           | Het      | Histidinemia                           | 3/125            |
| IMD_103   | 17 $\alpha$ -OHP | 12       | 15.6       | <i>ALDH4A1</i>  | c.1387dupG        | p.A463fs      | EP                    | LP            | Het      | Hyperprolinemia                        | 4/125            |
| IMD_104   | 17 $\alpha$ -OHP | 12       | 12.8       | <i>DUOX2</i>    | c.C3328T          | p.R1110X      | EP                    | LP            | Het      | CH                                     | 1/125            |
|           |                  |          |            | <i>PRODH</i>    | c.230_230delinsCA |               | EP                    | LP            | Het      | Hyperprolinemia                        | 7/125            |

(Continued to the next page)

Supplemental Data Table S10. Continued

| Sample ID | Metabolite       | cut-off* | NBS tests*          | Gene            | NT alteration     | AA alteration | Conventional criteria | ACMG category | Zygoty | Disease                                                | Frequency in PCD |
|-----------|------------------|----------|---------------------|-----------------|-------------------|---------------|-----------------------|---------------|--------|--------------------------------------------------------|------------------|
| IMD_107   | 17 $\alpha$ -OHP | 12       | 18.3                | <i>DUOX2</i>    | c.G1232A          | p.R411K       | EP                    | VUS           | Het    | CH                                                     | 2/125            |
| IMD_109   | Met              | 60       | 80.753/<br>85.991   | <i>MMACHC</i>   | c.G482A           | p.R161Q       | KP                    | LP            | Het    | MMA                                                    | 1/125            |
| IMD_110   | FT4              | 0.8      | 0.3                 | <i>CBS</i>      | c.G346A           | p.G116R       | KP                    | LP            | Het    | Homocystinuria                                         | 2/125            |
| IMD_114   | 17 $\alpha$ -OHP | 12       | 85                  | <i>DUOX2</i>    | c.G2139T          | p.E713D       | EP                    | VUS           | Het    | CH                                                     | 1/125            |
|           |                  |          |                     | <i>GLDC</i>     | c.983dupG         | p.G328fs      | EP                    | LP            | Het    | Nonketotic hyperglycinemia                             | 1/125            |
| IMD_116   | 17 $\alpha$ -OHP | 12       | 31.3                | <i>GALK1</i>    | c.612-2->C        |               | EP                    | LP            | Het    | Galactosemia                                           | 1/125            |
| IMD_117   | 17 $\alpha$ -OHP | 12       | 16.9                | <i>TSHR</i>     | c.G733A           | p.G245S       | KP                    | LP            | Het    | CH                                                     | 3/125            |
| IMD_119   | Gal              | 13       | 25.2                | <i>ASL</i>      | c.G1039A          | p.D347N       | EP                    | VUS           | Het    | ASA                                                    | 1/125            |
| IMD_120   | 17 $\alpha$ -OHP | 12       | 25.9                | <i>CBS</i>      | c.G346A           | p.G116R       | KP                    | LP            | Het    | Homocystinuria                                         | 2/125            |
| IMD_121   | TSH              | 12       | 20.4                | <i>SLC7A7</i>   | c.T498G           | p.I166M       | EP                    | VUS           | Het    | Lysinuric protein intolerance                          | 8/125            |
| IMD_122   | 17 $\alpha$ -OHP | 12       | 13.9                | <i>PAH</i>      | c.A611G           | p.Y204C       | KP                    | LP            | Het    | Hyperphenylalaninemia                                  | 1/125            |
|           |                  |          |                     | <i>SLC7A7</i>   | c.T498G           | p.I166M       | EP                    | VUS           | Het    | Lysinuric protein intolerance                          | 8/125            |
|           |                  |          |                     | <i>TAT</i>      | c.G24A            | p.M8I         | EP                    | VUS           | Het    | Tyrosinemia                                            | 1/125            |
| IMD_126   | FT4              | 0.8      | 0.6                 | <i>HMGCL</i>    | c.G438T           | p.M146I       | EP                    | VUS           | Het    | 3-Hydroxy-3-methylglutaryl-coenzyme A lyase deficiency | 1/125            |
| IMD_127   | TSH              | 12       | 14.6                | <i>PDP1</i>     | c.G56A            | p.R19K        | EP                    | VUS           | Het    | Pyruvate dehydrogenase deficiency                      | 2/125            |
| IMD_130   | Tyr              | 299.35   | 335.282/<br>341.969 | <i>TPO</i>      | c.C2515T          | p.P839S       | KP                    | LP            | Het    | CH                                                     | 3/125            |
|           |                  |          |                     | <i>SLC25A13</i> | c.851delGTAT      | p.M285Pfs*2   | KP                    | P             | Het    | Citrullinemia                                          | 4/125            |
| IMD_132   | Gal              | 13       | 14.8                | <i>ACADSB</i>   | c.C283A           | p.Q95K        | EP                    | VUS           | Het    | 2-MBCAD deficiency                                     | 1/125            |
|           |                  |          |                     | <i>SLC7A7</i>   | c.T498G           | p.I166M       | EP                    | VUS           | Hom    | Lysinuric protein intolerance                          | 8/125            |
| IMD_133   | Gal              | 13       | 15.5                | <i>DLAT</i>     | c.C998G           | p.P333R       | EP                    | VUS           | Het    | Pyruvate dehydrogenase deficiency                      | 2/125            |
|           |                  |          |                     | <i>OTC</i>      | c.298+5G>C        |               | KP                    | LP            | Het    | OTC deficiency                                         | 4/125            |
| IMD_135   | Gal              | 13       | 15                  | <i>DUOX2</i>    | c.T535C           | p.Y179H       | EP                    | VUS           | Het    | CH                                                     | 2/125            |
| IMD_136   | Gal              | 13       | 20                  | <i>ETHE1</i>    | c.C530T           | p.S177L       | EP                    | VUS           | Het    | Ethylmalonic encephalopathy                            | 1/125            |
| IMD_140   | Gal              | 13       | 19.2                | <i>ACADSB</i>   | c.G655A           | p.V219M       | EP                    | VUS           | Het    | 2-MBCAD deficiency                                     | 2/125            |
|           |                  |          |                     | <i>HAL</i>      | c.G1051C          | p.A351P       | EP                    | VUS           | Het    | Histidinemia                                           | 3/125            |
| IMD_145   | TSH              | 12       | 12.9                | <i>PCCA</i>     | c.G1598T          | p.W533L       | KP                    | LP            | Het    | Propionic Acidemia                                     | 9/125            |
| IMD_146   | TSH              | 12       | 15                  | <i>DLD</i>      | c.G44C            | p.G15A        | EP                    | VUS           | Het    | MSUD                                                   | 1/125            |
| IMD_148   | TSH              | 12       | 12.1                | <i>MAT1A</i>    | c.C142A           | p.Q48K        | EP                    | VUS           | Het    | Hypermethioninemia                                     | 1/125            |
| IMD_151   | TSH              | 12       | 15.1                | <i>MTHFR</i>    | c.1266dupG        | p.E423fs      | EP                    | LP            | Het    | Homocystinuria                                         | 1/125            |
|           |                  |          |                     | <i>HADHA</i>    | c.T1947A          | p.N649K       | EP                    | VUS           | Het    | Trifunctional protein deficiency                       | 2/125            |
|           |                  |          |                     | <i>PRODH</i>    | c.230_230delinsCA |               | EP                    | LP            | Het    | Hyperprolinemia                                        | 7/125            |

(Continued to the next page)

Supplemental Data Table S10. Continued

| Sample ID | Metabolite               | cut-off*  | NBS tests*          | Gene           | NT alteration | AA alteration | Conventional criteria | ACMG category | Zygoty | Disease                               | Frequency in PCD |
|-----------|--------------------------|-----------|---------------------|----------------|---------------|---------------|-----------------------|---------------|--------|---------------------------------------|------------------|
| IMD_154   | FT4                      | 0.8       | 0.6                 | <i>GALE</i>    | c.264delT     | p.F88fs       | EP                    | LP            | Het    | Galactosemia                          | 2/125            |
|           |                          |           |                     | <i>SLC7A7</i>  | c.T498G       | p.I166M       | EP                    | VUS           | Het    | Lysinuric protein intolerance         | 8/125            |
|           |                          |           |                     | <i>BCKDHA</i>  | c.G736A       | p.A246T       | EP                    | VUS           | Het    | MSUD                                  | 2/125            |
| IMD_156   | FT4                      | 0.7       | 0.5                 | <i>ASS1</i>    | c.C851T       | p.T284I       | KP                    | LP            | Het    | Citrullinemia                         | 1/125            |
| IMD_158   | FT4                      | 0.7       | 0.6                 | <i>MTHFR</i>   | c.C136T       | p.R46W        | KP                    | LP            | Het    | Homocystinuria                        | 2/125            |
|           |                          |           |                     | <i>GLYCTK</i>  | c.G673A       | p.G225R       | EP                    | VUS           | Het    | D-glyceric aciduria                   | 1/125            |
|           |                          |           |                     | <i>PCCB</i>    | c.A1304G      | p.Y435C       | KP                    | LP            | Het    | Propionic Acidemia                    | 2/125            |
|           |                          |           |                     | <i>GALT</i>    | 0.0001        | .             | KP                    | LP            | Het    | Galactosemia                          | 4/125            |
| IMD_162   | C5                       | 0.81      | 1.909/<br>1.599     | <i>PC</i>      | c.G440A       | p.R147H       | EP                    | VUS           | Het    | Pyruvate carboxylase deficiency       | 2/125            |
|           |                          |           |                     | <i>SLC7A7</i>  | c.498_499insC | p.C167fs      | EP                    | LP            | Hom    | Lysinuric protein intolerance         | 2/125            |
|           |                          |           |                     | <i>SLC7A7</i>  | c.T498G       | p.I166M       | EP                    | VUS           | Hom    | Lysinuric protein intolerance         | 8/125            |
| IMD_163   | C4DC                     | 0.8       | 1.109/<br>1.080     | <i>ALDH4A1</i> | c.1387dupG    | p.A463fs      | EP                    | LP            | Het    | Hyperprolinemia                       | 4/125            |
|           |                          |           |                     | <i>TAT</i>     | c.A574G       | p.K192E       | EP                    | VUS           | Het    | Tyrosinemia                           | 1/125            |
|           |                          |           |                     | <i>PCCB</i>    | c.C1148T      | p.A383V       | EP                    | VUS           | Het    | Propionic Acidemia                    | 1/125            |
| IMD_165   | 17 $\alpha$ -OHP/<br>FT4 | 12.0/0.7  | 16.3/<br>0.6        | <i>MTR</i>     | c.3339delC    | p.R1113fs     | EP                    | LP            | Het    | Homocystinuria                        | 11/125           |
|           |                          |           |                     | <i>AHCY</i>    | c.T98C        | p.M33T        | EP                    | VUS           | Het    | Hypermethioninemia                    | 4/125            |
| IMD_166   | 17 $\alpha$ -OHP/<br>FT4 | 12.0/0.7  | 30/0.5              | <i>SLC7A7</i>  | c.T498G       | p.I166M       | EP                    | VUS           | Het    | Lysinuric protein intolerance         | 8/125            |
|           |                          |           |                     | <i>MTRR</i>    | c.G754T       | p.V252L       | EP                    | VUS           | Het    | Homocystinuria                        | 1/125            |
| IMD_173   | 17 $\alpha$ -OHP         | 12        | 21.3                | <i>NAGS</i>    | c.A541G       | p.T181A       | EP                    | VUS           | Het    | N-acetylglutamate synthase deficiency | 1/125            |
|           |                          |           |                     | <i>ETFDH</i>   | c.A350G       | p.H117R       | EP                    | VUS           | Het    | Glutaric acidemia type II             | 1/125            |
| IMD_175   | 17 $\alpha$ -OHP         | 12        | 49.9                | <i>ALDH4A1</i> | c.1387dupG    | p.A463fs      | EP                    | LP            | Het    | Hyperprolinemia                       | 4/125            |
|           |                          |           |                     | <i>AASS</i>    | c.C2633A      | p.T878N       | EP                    | VUS           | Het    | Hyperlysinemia                        | 1/125            |
| IMD_179   | 17 $\alpha$ -OHP         | 12        | 23.9                | <i>TPO</i>     | c.C1626A      | p.P542P       | EP                    | VUS           | Het    | CH                                    | 1/125            |
| IMD_180   | 17 $\alpha$ -OHP         | 12        | 12.2                | <i>PCCB</i>    | c.30_39del    | p.V10fs       | EP                    | LP            | Het    | Propionic Acidemia                    | 1/125            |
| IMD_181   | 17 $\alpha$ -OHP         | 12        | 36.6                | <i>TPO</i>     | c.T2423A      | p.M808K       | EP                    | VUS           | Het    | CH                                    | 1/125            |
| IMD_184   | Tyr                      | 299.35    | 571.513/<br>627.341 | <i>NAGS</i>    | c.A505T       | p.M169L       | EP                    | VUS           | Het    | N-acetylglutamate synthase deficiency | 3/125            |
| IMD_185   | TSH/GAL                  | 12.0/13.0 | 14/23.1             | <i>PCCA</i>    | c.C343A       | p.P115T       | EP                    | VUS           | Het    | Propionic Acidemia                    | 1/125            |
| IMD_188   | TSH/FT4                  | 12.0/0.8  | 32.6/0.7            | <i>GALE</i>    | c.G905A       | p.G302D       | KP                    | LP            | Het    | Galactosemia                          | 3/125            |
|           |                          |           |                     | <i>PCCB</i>    | c.G389T       | p.G130V       | EP                    | VUS           | Het    | Propionic Acidemia                    | 2/125            |
| IMD_190   | TSH/FT4                  | 12.0/0.8  | 45.1/0.7            | <i>MTHFR</i>   | c.C1417T      | p.R473W       | EP                    | VUS           | Het    | Homocystinuria                        | 2/125            |
| IMD_193   | TSH                      | 12        | 12                  | <i>QDPR</i>    | c.G520A       | p.G174R       | EP                    | VUS           | Het    | Hyperphenylalaninemia                 | 1/125            |
| IMD_194   | TSH                      | 12        | 64.8                | <i>HADHA</i>   | c.T1947A      | p.N649K       | EP                    | VUS           | Het    | Trifunctional protein deficiency      | 2/125            |
|           |                          |           |                     | <i>SLC1A1</i>  | c.G447C       | p.M149I       | EP                    | VUS           | Het    | Dicarboxylic aminoaciduria            | 1/125            |

(Continued to the next page)

Supplemental Data Table S10. Continued

| Sample ID | Metabolite | cut-off* | NBS tests* | Gene            | NT alteration   | AA alteration | Conventional criteria | ACMG category | Zygosity | Disease                               | Frequency in PCD |
|-----------|------------|----------|------------|-----------------|-----------------|---------------|-----------------------|---------------|----------|---------------------------------------|------------------|
| IMD_195   | TSH        | 12       | 16.6       | <i>PAH</i>      | c.968_969del    | p.T323fs      | EP                    | LP            | Het      | Hyperphenylalaninemia                 | 1/125            |
|           |            |          |            | <i>MTRR</i>     | c.C268T         | p.R90W        | EP                    | VUS           | Het      | Homocystinuria                        | 1/125            |
|           |            |          |            | <i>CYP21A2</i>  | c.G1084A        | p.A362T       | KP                    | LP            | Het      | CAH                                   | 1/125            |
| IMD_198   | TSH        | 12       | 18.3       | <i>GCDH</i>     | c.T32C          | p.L11P        | EP                    | VUS           | Het      | Glutaric acidemia type I              | 1/125            |
|           |            |          |            | <i>HADHA</i>    | c.1689+2T>G     |               | KP                    | P             | Het      | Trifunctional protein deficiency      | 1/125            |
|           |            |          |            | <i>AMT</i>      | c.C751T         | p.R251C       | EP                    | VUS           | Het      | Nonketotic hyperglycinemia            | 1/125            |
| IMD_199   | TSH        | 12       | 15.2       | <i>ACADM</i>    | c.T622A         | p.Y208N       | KP                    | LP            | Het      | MCAD deficiency                       | 1/125            |
| IMD_200   | TSH        | 12       | 12.9       | <i>ACADS</i>    | c.C164T         | p.P55L        | KP                    | LP            | Het      | SCAD deficiency                       | 1/125            |
| IMD_201   | TSH        | 12       | 17.9       | <i>GALE</i>     | c.G1004A        | p.R335H       | KP                    | LP            | Het      | Galactosemia                          | 1/125            |
| IMD_202   | TSH        | 12       | 12.5       | <i>GALE</i>     | c.C715T         | p.R239W       | KP                    | LP            | Het      | Galactosemia                          | 1/125            |
| IMD_205   | TSH        | 12       | 12.7       | <i>PAH</i>      | c.C721T         | p.R241C       | KP                    | LP            | ComHet   | Hyperphenylalaninemia                 | 1/125            |
|           |            |          |            | <i>PAH</i>      | c.442-1G>A      |               | KP                    | P             | ComHet   | Hyperphenylalaninemia                 | 1/125            |
|           |            |          |            | <i>SLC25A13</i> | c.C674A         | p.S225X       | KP                    | P             | Het      | Citrullinemia                         | 1/125            |
| IMD_207   | TSH        | 12       | 17         | <i>MUT</i>      | c.T1481A        | p.L494X       | KP                    | P             | Het      | MMA                                   | 1/125            |
| IMD_213   | Gal        | 13       | 17.1       | <i>CBS</i>      | c.C190G         | p.P64A        | EP                    | VUS           | Het      | Homocystinuria                        | 1/125            |
| IMD_214   | Gal        | 13       | 21.4       | <i>DUOX2</i>    | c.T3239C        | p.I1080T      | KP                    | LP            | ComHet   | CH                                    | 2/125            |
|           |            |          |            | <i>DUOX2</i>    | c.A2678G        | p.N893S       | EP                    | VUS           | ComHet   | CH                                    | 1/125            |
| IMD_216   | Gal        | 13       | 13.5       | <i>DUOX2</i>    | c.G4232A        | p.C1411Y      | KP                    | VUS           | ComHet   | CH                                    | 2/125            |
|           |            |          |            | <i>DUOX2</i>    | c.G617T         | p.G206V       | KP                    | VUS           | ComHet   | CH                                    | 1/125            |
|           |            |          |            | <i>ETFDH</i>    | c.1323delC      | p.C441X       | EP                    | LP            | Het      | Glutaric acidemia type II             | 1/125            |
| IMD_218   | TSH/FT4    | 12.0/0.7 | 44.2/0.7   | <i>GCH1</i>     | c.91_92insCACAG | p.G31fs       | EP                    | LP            | Het      | Hyperphenylalaninemia                 | 9/125            |
|           |            |          |            | <i>FAH</i>      | c.C622T         | p.P208S       | EP                    | VUS           | Het      | Tyrosinemia                           | 1/125            |
| IMD_222   | TSH        | 12       | 38.8       | <i>NAGS</i>     | c.A505T         | p.M169L       | EP                    | VUS           | Het      | N-acetylglutamate synthase deficiency | 3/125            |
| IMD_223   | TSH        | 12       | 40.9       | <i>PAH</i>      | c.G728A         | p.R243Q       | KP                    | LP            | Het      | Hyperphenylalaninemia                 | 1/125            |
|           |            |          |            | <i>GALT</i>     | 0.0001          | .             | KP                    | LP            | Het      | Galactosemia                          | 4/125            |
| IMD_224   | TSH        | 12       | 12.9       | <i>MTHFR</i>    | c.T248G         | p.M83R        | EP                    | VUS           | Het      | Homocystinuria                        | 1/125            |
| IMD_227   | TSH        | 12       | 47.6       | <i>ASL</i>      | c.C94T          | p.R32W        | EP                    | VUS           | Het      | ASA                                   | 1/125            |
| IMD_228   | TSH        | 12       | 20.2       | <i>PC</i>       | c.C2324T        | p.T775M       | EP                    | VUS           | Het      | Pyruvate carboxylase deficiency       | 1/125            |
| IMD_229   | FT4        | 0.7      | 0.6        | <i>MTHFR</i>    | c.C1475T        | p.P492L       | EP                    | VUS           | Het      | Homocystinuria                        | 1/125            |
|           |            |          |            | <i>ETFDH</i>    | c.G170A         | p.W57X        | EP                    | P             | Het      | Glutaric acidemia type II             | 1/125            |
| IMD_231   | FT4        | 0.7      | 0.1        | <i>ACAT1</i>    | c.C772T         | p.R258C       | EP                    | VUS           | Het      | 3-oxothiolase deficiency              | 1/125            |
| IMD_232   | FT4        | 0.7      | 0.5        | <i>CPS1</i>     | c.A1778G        | p.Y593C       | EP                    | VUS           | Het      | CPS I deficiency                      | 1/125            |
| IMD_240   | FT4        | 0.8      | 0.1        | <i>GCH1</i>     | c.91_92insCACAG | p.G31fs       | EP                    | LP            | Het      | Hyperphenylalaninemia                 | 9/125            |
| IMD_241   | FT4        | 0.8      | 0.5        | <i>MMACHC</i>   | c.A589G         | p.N197D       | EP                    | VUS           | Het      | MMA                                   | 1/125            |
| IMD_242   | FT4        | 0.8      | 0.7        | <i>NAGS</i>     | c.A505T         | p.M169L       | EP                    | VUS           | Het      | N-acetylglutamate synthase deficiency | 3/125            |

(Continued to the next page)

Supplemental Data Table S10. Continued

| Sample ID | Metabolite               | cut-off*  | NBS tests*                  | Gene            | NT alteration   | AA alteration | Conventional criteria | ACMG category | Zygoty | Disease                                 | Frequency in PCD |
|-----------|--------------------------|-----------|-----------------------------|-----------------|-----------------|---------------|-----------------------|---------------|--------|-----------------------------------------|------------------|
| IMD_243   | FT4                      | 0.8       | 0.6                         | <i>SLC7A7</i>   | c.498_499insC   | p.C167fs      | EP                    | LP            | Hom    | Lysinuric protein intolerance           | 2/125            |
|           |                          |           |                             | <i>SLC7A7</i>   | c.T498G         | p.I166M       | EP                    | VUS           | Het    | Lysinuric protein intolerance           | 8/125            |
| IMD_247   | FT4                      | 0.8       | 0.5                         | <i>GCH1</i>     | c.91_92insCACAG | p.G31fs       | EP                    | LP            | Het    | Hyperphenylalaninemia                   | 9/125            |
| IMD_248   | FT4                      | 0.8       | 0.3                         | <i>GCH1</i>     | c.91_92insCACAG | p.G31fs       | EP                    | LP            | Het    | Hyperphenylalaninemia                   | 9/125            |
| IMD_250   | FT4                      | 0.8       | 0.7                         | <i>GCH1</i>     | c.91_92insCACAG | p.G31fs       | EP                    | LP            | Het    | Hyperphenylalaninemia                   | 9/125            |
|           |                          |           |                             | <i>SLC25A13</i> | c.C1978A        | p.P660T       | EP                    | VUS           | Het    | Citrullinemia                           | 1/125            |
| IMD_252   | Cit                      | 55        | 61.588/<br>55.158           | <i>GCH1</i>     | c.91_92insCACAG | p.G31fs       | EP                    | LP            | Het    | Hyperphenylalaninemia                   | 9/125            |
|           |                          |           |                             | <i>CBS</i>      | c.A647G         | p.N216S       | EP                    | VUS           | Het    | Homocystinuria                          | 1/125            |
| IMD_254   | C5                       | 0.81      | 5.911/5.115                 | <i>SLC5A5</i>   | c.A674G         | p.N225S       | EP                    | VUS           | Het    | CH                                      | 1/125            |
| IMD_255   | C5                       | 0.81      | 3.73/3.993                  | <i>ALDH4A1</i>  | c.A1334G        | p.Y445C       | EP                    | VUS           | Het    | Hyperprolinemia                         | 1/125            |
|           |                          |           |                             | <i>GALE</i>     | c.C629T         | p.P210L       | EP                    | VUS           | Het    | Galactosemia                            | 1/125            |
|           |                          |           |                             | <i>CYP21A2</i>  | c.293-13C>G     |               | KP                    | LP            | Het    | CAH                                     | 2/125            |
| IMD_256   | C5                       | 0.81      | 3.014/3.852                 | <i>PCCA</i>     | c.G1598T        | p.W533L       | KP                    | LP            | Het    | Propionic Acidemia                      | 9/125            |
|           |                          |           |                             | <i>AMT</i>      | c.T767C         | p.M256T       | EP                    | VUS           | Het    | Nonketotic hyperglycinemia              | 1/125            |
| IMD_257   | C4DC                     | 0.8       | 1.644/1.406                 | <i>ACAD8</i>    | c.A529G         | p.K177E       | EP                    | VUS           | Het    | Isobutyryl-CoA dehydrogenase deficiency | 1/125            |
| IMD_259   | C3                       | 5         | 11.277/<br>16.213           | <i>PDP1</i>     | c.G56A          | p.R19K        | EP                    | VUS           | Het    | Pyruvate dehydrogenase deficiency       | 2/125            |
| IMD_261   | C0, C5                   | 7.0/0.81  | 1.608/0.080/<br>1.845       | <i>GCH1</i>     | c.91_92insCACAG | p.G31fs       | EP                    | LP            | Het    | Hyperphenylalaninemia                   | 9/125            |
|           |                          |           |                             | <i>AHCY</i>     | c.T98C          | p.M33T        | EP                    | VUS           | Het    | Hypermethioninemia                      | 4/125            |
|           |                          |           |                             | <i>BTBD</i>     | c.G1625T        | p.R542M       | EP                    | VUS           | Het    | Biotinidase deficiency                  | 3/125            |
| IMD_262   | C0, C3                   | 59.44/5   | 76.94/71.25,<br>4.913/5.586 | <i>HAL</i>      | c.G394A         | p.V132M       | EP                    | VUS           | Het    | Histidinemia                            | 5/125            |
| IMD_265   | 17 $\alpha$ -OHP/<br>FT4 | 12.0/0.12 | 39.3/0.4                    | <i>PCCA</i>     | c.G1598T        | p.W533L       | KP                    | LP            | Het    | Propionic Acidemia                      | 9/125            |
|           |                          |           |                             | <i>PCCB</i>     | c.A1316G        | p.Y439C       | KP                    | LP            | Het    | Propionic Acidemia                      | 3/125            |
| IMD_266   | 17 $\alpha$ -OHP/<br>FT4 | 12.0/0.7  | 16.8/0.6                    | <i>PCCA</i>     | c.G1598T        | p.W533L       | KP                    | LP            | Het    | Propionic Acidemia                      | 9/125            |
|           |                          |           |                             | <i>GCH1</i>     | c.91_92insCACAG | p.G31fs       | EP                    | LP            | Het    | Hyperphenylalaninemia                   | 9/125            |
|           |                          |           |                             | <i>PCCB</i>     | c.A1316G        | p.Y439C       | KP                    | LP            | Het    | Propionic Acidemia                      | 3/125            |
| IMD_269   | 17 $\alpha$ -OHP/<br>FT4 | 12.0/0.8  | 20.8/0.5                    | <i>SLC7A7</i>   | c.A1384G        | p.R462G       | EP                    | VUS           | Het    | Lysinuric protein intolerance           | 1/125            |
| IMD_270   | 17 $\alpha$ -OHP/<br>FT4 | 12.0/0.14 | 104.4/0.7                   | <i>HAL</i>      | c.G394A         | p.V132M       | EP                    | VUS           | Het    | Histidinemia                            | 5/125            |
| IMD_271   | 17 $\alpha$ -OHP/<br>FT4 | 12.0/0.15 | 102.3/0.5                   | <i>CPT2</i>     | c.C1891T        | p.R631C       | KP                    | LP            | Het    | CPT deficiency                          | 1/125            |
|           |                          |           |                             | <i>BCKDHA</i>   | c.G736A         | p.A246T       | EP                    | VUS           | Het    | MSUD                                    | 2/125            |
| IMD_273   | 17 $\alpha$ -OHP         | 12        | 14.1                        | <i>HPD</i>      | c.G22A          | p.G8R         | EP                    | VUS           | Het    | Tyrosinemia                             | 2/125            |

(Continued to the next page)

**Supplemental Data Table S10.** Continued

| Sample ID | Metabolite       | cut-off* | NBS tests* | Gene | NT alteration   | AA alteration | Conventional criteria | ACMG category | Zygosity | Disease                    | Frequency in PCD |
|-----------|------------------|----------|------------|------|-----------------|---------------|-----------------------|---------------|----------|----------------------------|------------------|
| IMD_273   | 17 $\alpha$ -OHP | 12       | 14.1       | GLDC | c.G2137A        | p.V713M       | EP                    | VUS           | Het      | Nonketotic hyperglycinemia | 1/125            |
| IMD_274   | 17 $\alpha$ -OHP | 12       | 27         | GCH1 | c.91_92insCACAG | p.G31fs       | EP                    | LP            | Het      | Hyperphenylalaninemia      | 9/125            |
| IMD_275   | 17 $\alpha$ -OHP | 12       | 16.9       | TSHR | c.G394C         | p.G132R       | KP                    | LP            | Het      | CH                         | 1/125            |
|           |                  |          |            | PCCB | c.G389T         | p.G130V       | EP                    | VUS           | Het      | Propionic Acidemia         | 2/125            |

Reference sequences of AASS, ACAD8, ACADM, ACADS, ACADSB, ACADVL, ACAT1, AHCY, ALDH4A1, AMT, ASL, ASS1, BCKDHA, BTD, CBS, CPS1, CPT2, CYP21A2, DBT, DLAT, DLD, DUOX2, DUOX2, ETFA, ETFB, ETFDH, ETHE1, FAH, GALE, GALK1, GALT, GCDH, GCH1, GLDC, GLYCK, HADHA, HAL, HLCS, HMGCL, HPD, MAT1A, MMAA, MMACHC, MMADHC, MTHFR, MTR, MTRR, MUT, NAGS, OAT, OTC, PAH, PC, PCCA, PCCB, PDP1, PDX1, PRODH, QDPR, SLC1A1, SLC22A5, SLC25A13, SLC25A15, SLC25A20, SLC5A5, SLC6A8, SLC7A7, TAT, TPO, and TSHR were NM\_005763, NM\_014384, NM\_001286044, NM\_000017, NM\_001609, NM\_001033859, NM\_000019, NM\_000687, NM\_001161504, NM\_001164710, NM\_001024944, NM\_054012, NM\_000709, NM\_000060, NM\_000071, NM\_001122634, NM\_000098, NM\_001128590, NM\_001918, NM\_001931, NM\_000108, NM\_014080, NM\_207581, NM\_001127716, NM\_001014763, NM\_001281738, NM\_014297, NM\_000137, NM\_001127621, NM\_000154, NM\_000155, NM\_000159, NM\_000161, NM\_000170, NM\_145262, NM\_000182, NM\_001258333, NM\_000411, NM\_001166059, NM\_002150, NM\_000429, NM\_172250, NM\_015506, NM\_015702, NM\_005957, NM\_001291939, NM\_024010, NM\_000255, NM\_153006, NM\_000274, NM\_000531.5, NM\_000277, NM\_022172, NM\_001127692, NM\_000532, NM\_001161781, NM\_000209, NM\_001195226, NM\_000320, NM\_004170, NM\_003060, NM\_001160210, NM\_014252, NM\_000387, NM\_000453, NM\_001142805, NM\_001126105, NM\_000353, NM\_175721, and NM\_000369, respectively.

Units of TSH, FT4, and 17-OHP were mU/L, ng/dL, and ng/mL, respectively. The unit of the other metabolites were  $\mu$ mol/L.

Abbreviations: KP, known pathogenic based on the Human Genome Mutation Database (DM) or ClinVar (pathogenic) databases; EP, expected pathogenic based on population frequency, *in silico* prediction, and mutation type (loss of function mutations); LP, likely pathogenic; VUS, variant of unknown significance; Het, heterozygous; ComHet, compound heterozygous; Hom, homozygous; CH, Congenital hypothyroidism; MMA, Methylmalonic Acidemia; CPS I deficiency, Carbamoyl phosphate synthetase I deficiency; 2-MBCAD deficiency, 2-Methylbutyryl-coenzyme A dehydrogenase deficiency; CACT deficiency, Carnitine acylcarnitine translocase deficiency; ASA, Argininosuccinic aciduria; OAT deficiency, Ornithine carbamoyltransferase deficiency; MSUD, Maple syrup urine disease; CPT deficiency, Carnitine palmitoyl transferase deficiency; CAH, Congenital adrenal hyperplasia; 17 $\alpha$ -OHP, 17-hydroxyprogesterone; TSH, thyroid stimulating hormone; FT4, Free T4.
