# Supplementary material for: A Population-Based Genomic Study of Inherited Metabolic Diseases Detected Through Newborn Screening
Source: PubMed Central journal article supplement — Ann Lab Med. 2016 Aug 24;36(6):561–72. doi: 10.3343/alm.2016.36.6.561 (PMC5011110; doi:10.3343/alm.2016.36.6.561), 2016-08-24
Supplement: alm-36-561-s012.pdf [file alm-36-561-s012.pdf]

Supplemental Data Table S11. *In silico* analyses of mutations identified in association positive cases

| Gene            | NT alteration | AA alteration | Conventional criteria | ACMG criteria | 1000G  | ExAC   | ESP6500 | SIFT | Polyphen2 | LRT | Mutation taster | Mutation assessor | FATHMM | GERP++ |
|-----------------|---------------|---------------|-----------------------|---------------|--------|--------|---------|------|-----------|-----|-----------------|-------------------|--------|--------|
| <i>DUOX2</i>    | c.1232G>A     | p.R411K       | EP                    | VUS           | ND     | 0      | ND      | T    | B         | D   | D               | M                 | NA     | 5.36   |
| <i>DUOX2</i>    | c.1588A>T     | p.K530X       | KP                    | P             | 0.0006 | 0.0007 | ND      | T    | NA        | N   | A               | NA                | NA     | 4.63   |
| <i>DUOX2</i>    | c.2654G>A     | p.R885Q       | KP                    | LP            | ND     | 0.0001 | ND      | NA   | D         | D   | D               | L                 | NA     | 4.29   |
| <i>DUOX2</i>    | c.4010G>T     | p.G1337V      | EP                    | VUS           | ND     | ND     | ND      | D    | D         | D   | D               | H                 | NA     | 5.57   |
| <i>DUOX2</i>    | c.1462G>A     | p.G488R       | KP                    | LP            | ND     | ND     | ND      | NA   | NA        | NA  | NA              | NA                | NA     | NA     |
| <i>DUOX2</i>    | c.2635G>A     | p.E879K       | KP                    | LP            | ND     | 0      | ND      | D    | D         | D   | D               | H                 | NA     | 5.23   |
| <i>DUOX2</i>    | c.3616G>A     | p.A1206T      | EP                    | VUS           | ND     | 0      | ND      | D    | D         | D   | D               | M                 | NA     | 5.69   |
| <i>DUOX2</i>    | c.3329G>A     | p.R1110Q      | KP                    | LP            | 0.0004 | 0.0002 | ND      | D    | D         | D   | D               | H                 | NA     | 5.6    |
| <i>DUOX2</i>    | c.1319G>A     | p.S440N       | EP                    | VUS           | ND     | ND     | ND      | T    | B         | D   | D               | M                 | NA     | 4.18   |
| <i>DUOX2</i>    | c.227C>T      | p.P76L*       | EP                    | VUS           | ND     | 0      | ND      | T    | D         | D   | D               | M                 | NA     | 5.84   |
| <i>DUOXA2</i>   | c.413dupA     | p.Y138X       | KP                    | LP            | ND     | 0.0002 | ND      | NA   | NA        | NA  | NA              | NA                | NA     | NA     |
| <i>DUOXA2</i>   | c.535T>C      | p.Y179H**     | EP                    | VUS           | ND     | 0.0001 | ND      | D    | D         | D   | D               | M                 | T      | 5.3    |
| <i>DUOXA2</i>   | c.738C>G      | p.Y246X       | KP                    | P             | ND     | 0.0002 | ND      | T    | NA        | N   | D               | NA                | NA     | -2.3   |
| <i>DUOXA2</i>   | c.280C>T      | p.R94C        | EP                    | VUS           | ND     | ND     | ND      | D    | D         | N   | N               | M                 | T      | 5.38   |
| <i>GALE</i>     | c.1002G>A     | p.W334X       | EP                    | P             | ND     | ND     | ND      | T    | NA        | D   | D               | NA                | NA     | 4.89   |
| <i>GALE</i>     | c.47G>A       | p.S16N        | EP                    | VUS           | ND     | ND     | ND      | D    | D         | D   | D               | H                 | D      | 4.89   |
| <i>GALE</i>     | c.905G>A      | p.G302D       | KP                    | LP            | ND     | 0      | ND      | D    | D         | D   | A               | H                 | D      | 4.47   |
| <i>GALE</i>     | c.264delT     | p.F88fs       | EP                    | LP            | ND     | ND     | ND      | NA   | NA        | NA  | NA              | NA                | NA     | NA     |
| <i>GALE</i>     | c.38A>G       | p.Y13C        | EP                    | VUS           | ND     | ND     | ND      | D    | D         | D   | D               | H                 | D      | 4.89   |
| <i>GALE</i>     | c.10A>G       | p.K4E         | EP                    | VUS           | ND     | ND     | ND      | T    | B         | N   | D               | M                 | D      | 3.74   |
| <i>GALK1</i>    | c.1159G>A     | p.A387T       | EP                    | VUS           | 0.0002 | 0      | ND      | T    | D         | N   | D               | M                 | D      | 4.84   |
| <i>GALT</i>     | c.50+1G>A     | c.50+1G>A     | KP                    | P             | ND     | 0      | ND      | NA   | NA        | NA  | D               | NA                | NA     | 5.53   |
| <i>GALT</i>     | c.998G>A      | p.R333Q       | KP                    | LP            | ND     | 0      | ND      | D    | D         | U   | A               | M                 | D      | 5.2    |
| <i>GALT</i>     | c.1034C>A     | p.A345D       | KP                    | LP            | ND     | ND     | ND      | T    | PD        | U   | A               | M                 | D      | 5.21   |
| <i>MCCC1</i>    | c.475T>C      | p.C159R       | KP                    | LP            | ND     | 0      | ND      | D    | D         | D   | D               | H                 | D      | 5.46   |
| <i>MCCC1</i>    | c.288+2T>A    | NA            | KP                    | P             | 0.0002 | 0      | ND      | NA   | NA        | NA  | D               | NA                | NA     | 5.9    |
| <i>MUT</i>      | c.2179C>T     | p.R727X       | KP                    | P             | ND     | 0      | ND      | T    | NA        | D   | D               | NA                | NA     | 4.67   |
| <i>MUT</i>      | c.322C>T      | p.R108C       | KP                    | LP            | 0.0002 | 0.0001 | ND      | D    | D         | D   | A               | H                 | D      | 5.61   |
| <i>MUT</i>      | c.1228A>G     | p.I410V       | EP                    | VUS           | ND     | ND     | ND      | D    | PD        | D   | D               | M                 | D      | 5.49   |
| <i>PAH</i>      | c.1065+1G>A   | NA            | KP                    | P             | ND     | ND     | ND      | NA   | NA        | NA  | D               | NA                | NA     | 5.81   |
| <i>PAX8</i>     | c.300dupTACC  | p.M102fs      | EP                    | LP            | ND     | ND     | ND      | NA   | NA        | NA  | NA              | NA                | NA     | NA     |
| <i>PAX8</i>     | c.192G>C      | p.R64S        | EP                    | VUS           | ND     | ND     | ND      | D    | D         | D   | D               | H                 | D      | 5.18   |
| <i>PAX8</i>     | c.739G>A      | p.E247K       | EP                    | VUS           | ND     | ND     | ND      | D    | PD        | D   | D               | L                 | D      | 4.54   |
| <i>SLC25A13</i> | c.851delGTAT  | p.M285Pfs*2   | KP                    | P             | 0.0008 | 0.0003 | ND      | NA   | NA        | NA  | NA              | NA                | NA     | NA     |
| <i>SLC25A13</i> | c.1180+1G>A   | NA            | KP                    | P             | 0.0008 | 0.0001 | ND      | NA   | NA        | NA  | A               | NA                | NA     | 4.72   |
| <i>SLC5A5</i>   | c.1060A>C     | p.T354P       | KP                    | LP            | ND     | 0      | ND      | D    | D         | D   | A               | H                 | D      | 4.36   |
| <i>SLC5A5</i>   | c.1605del     | p.G535fs      | EP                    | LP            | ND     | ND     | ND      | NA   | NA        | NA  | NA              | NA                | NA     | NA     |
| <i>TPO</i>      | c.1061G>T     | p.W354L       | EP                    | VUS           | ND     | ND     | ND      | D    | D         | D   | D               | M                 | T      | 5.3    |
| <i>TSHR</i>     | c.1454C>A     | p.A485D***    | EP                    | VUS           | ND     | ND     | ND      | D    | D         | D   | D               | M                 | D      | 5.64   |
| <i>TSHR</i>     | c.403A>T      | p.N135Y       | EP                    | VUS           | ND     | ND     | ND      | D    | D         | D   | D               | M                 | D      | 5.8    |

(Continued to the next page)

Supplemental Data Table S11. Continued

| Gene        | NT alteration | AA alteration | Conventional criteria | ACMG criteria | 1000G  | ExAC   | ESP6500 | SIFT | Polyphen2 | LRT | Mutation taster | Mutation assessor | FATHMM | GERP++ |
|-------------|---------------|---------------|-----------------------|---------------|--------|--------|---------|------|-----------|-----|-----------------|-------------------|--------|--------|
| <i>TSHR</i> | c.1349G>A     | p.R450H       | KP                    | LP            | 0.0002 | 0.0003 | ND      | D    | D         | D   | D               | H                 | D      | 5.74   |
| <i>TSHR</i> | c.611C>T      | p.A204V       | KP                    | LP            | ND     | 0      | ND      | T    | D         | D   | D               | L                 | D      | 6.02   |
| <i>TSHR</i> | c.1556G>A     | p.R519H       | EP                    | VUS           | ND     | 0      | ND      | D    | D         | D   | D               | H                 | D      | 5.46   |
| <i>TSHR</i> | c.1449C>A     | p.N483K       | EP                    | VUS           | ND     | ND     | ND      | D    | D         | D   | D               | M                 | D      | 5.64   |

Reference sequences of *MUT*, *MCCC1*, *SLC25A13*, *DUOX2*, *TSHR*, *DUOX2A2*, *PAX8*, *GALE*, *GALT*, *GALT*, *PAH*, *SLC5A5*, *GALK1*, *TPO*, and *CYP21A2* were NM\_000255, NM\_001293273, NM\_001160210, NM\_014080, NM\_000369, NM\_207581, NM\_003466, NM\_001127621, NM\_001258332, NM\_000155, NM\_000277, NM\_000453, NM\_000154, NM\_175722, and NM\_000500.7, respectively.

\*KNIH1545408908 (allele frequency 0.00160772); \*\*KNIH1545404850 (allele frequency 0.000803859); \*\*\*KNIH1481609856 (allele frequency 0.000803859) based on Korean Reference Genome DB

Abbreviations: KP, known pathogenic based on the Human Genome Mutation Database (DM) or ClinVar (pathogenic) databases; EP, expected pathogenic based on population frequency, *in silico* prediction, and mutation type (loss of function mutations); P, Pathogenic; LP, Likely pathogenic; VUS, variant of unknown significance; ND, not detected; NA, not applicable; D, damaging (in PolyPhen)/deleterious (in SIFT, LRT, FATHMM, RadialSVM, and LR); PD, possibly damaging (in PolyPhen); H, high (functional); M, medium (functional); N, neutral (nonfunctional); L, low(nonfunctional); T, tolerated (in SIFT); B, benign (in PolyPhen).
